## Rhamnolipids and their 3-(3-hydroxyalkanooyloxy)alkanoic acid precursors activate *Arabidopsis* innate immunity through two independent mechanisms

Romain Schellenberger <sup>1\*</sup>, Jérôme Crouzet <sup>1\*</sup>, Arvin Nickzad <sup>2</sup>, Alexander Kutschera <sup>3</sup>, Tim Gerster <sup>3</sup>, Nicolas Borie <sup>4</sup>, Corinna Dawid <sup>5</sup>, Maude Cloutier <sup>2</sup>, Sandra Villaume <sup>1</sup>, Sandrine Dhondt-Cordelier <sup>1</sup>, Jane Hubert <sup>4</sup>, Sylvain Cordelier <sup>1</sup>, Florence Mazeyrat-Gourbeyre <sup>1</sup>, Christian Schmid <sup>5</sup>, Marc Ongena <sup>6</sup>, Jean-Hugues Renault <sup>4</sup>, Arnaud Haudrechy <sup>4</sup>, Thomas Hofmann <sup>5</sup>, Fabienne Baillieul <sup>1</sup>, Christophe Clément <sup>1</sup>, Cyril Zipfel <sup>7,8</sup>, Charles Gauthier <sup>2</sup>, Eric Déziel <sup>2</sup>, Stefanie Ranf <sup>3</sup> and Stéphan Dorey <sup>1</sup>

<sup>1</sup> Université de Reims Champagne-Ardenne, RIBP, EA 4707, SFR Condorcet FR CNRS 3417, 51687, Reims, France

<sup>2</sup> Centre Armand-Frappier Santé Biotechnologie, Institut national de la recherche scientifique (INRS), Laval, QC, H7V 1B7, Canada

<sup>3</sup> Phytopathology, TUM School of Life Sciences Weihenstephan, Technical University of Munich, Freising-Weihenstephan, 85354, Germany

<sup>4</sup> Université de Reims Champagne-Ardenne, CNRS, ICMR 7312, SFR Condorcet FR CNRS 3417, 51097, Reims France

<sup>5</sup> Food Chemistry and Molecular Sensory Science, TUM School of Life Sciences Weihenstephan, Technical University of Munich, Freising-Weihenstephan, 85354, Germany

<sup>6</sup> MiPI laboratory, SFR Condorcet FR CNRS 3417, Gembloux Agro-Bio Tech, University of Liège, Gembloux, B-5030, Belgium

<sup>7</sup> The Sainsbury Laboratory, University of East Anglia, Norwich Research Park, Norwich, NR4 7UH, UK

<sup>8</sup> Institute of Plant and Microbial Biology, Zurich-Basel Plant Science Center, University of Zurich, Zurich, Switzerland

\* These authors contributed equally to this work.

Correspondence and requests for materials should be addressed to E.D. ([eric.deziel@inrs.ca](mailto:eric.deziel@inrs.ca)); S.R. ([ranf@wzw.tum.de](mailto:ranf@wzw.tum.de)); S.D. ([stephan.dorey@univ-reims.fr](mailto:stephan.dorey@univ-reims.fr)).

### 1 Abstract

2 Plant innate immunity is activated upon perception of invasion pattern molecules by plant cell-surface  
3 immune receptors. Several bacteria of the genera *Pseudomonas* and *Burkholderia* produce rhamnolipids (RLs)  
4 from L-rhamnose and (R)-3-hydroxyalkanoate precursors (HAAs). RL and HAA secretion is required to modulate  
5 bacterial swarming motility behavior. The bulb-type lectin receptor kinase LIPOOLIGOSACCHARIDE-  
6 SPECIFIC REDUCED ELICITATION/S-DOMAIN-1-29 (LORE/SD1-29) mediates medium-chain 3-hydroxy fatty  
7 acid (mc-3-OH-FA) sensing in the plant *Arabidopsis thaliana*. Here, we show that the lipidic secretome from  
8 *Pseudomonas aeruginosa* comprising RLs, HAAs and mc-3-OH-FAs stimulates *Arabidopsis* immunity. HAAs,  
9 like mc-3-O-FAs, are sensed by LORE and induce canonical immune signaling and local resistance to plant  
10 pathogenic *Pseudomonas* infection. By contrast, RLs trigger an atypical immune response and resistance to  
11 *Pseudomonas* infection independent of LORE. Thus, the glycosyl moieties of RLs, albeit abolishing sensing by  
12 LORE, do not impair their ability to trigger plant defense. In addition, our results show that RL-triggered immune  
13 response is affected by the sphingolipid composition of the plasma membrane. In conclusion, RLs and their  
14 precursors released by bacteria can both be perceived by plants but through distinct mechanisms.  
15

## 16 Introduction

17 Plant innate immunity activation relies on detection of invasion pattern (IP) molecules that are perceived  
18 by plant cells<sup>1,2</sup>. Non-self-recognition IPs include essential components of whole classes of microorganisms,  
19 such as flagellin, peptidoglycans, mc-3-OH-FAs from bacteria or chitin and  $\beta$ -glucans from fungi and oomycetes,  
20 respectively<sup>3,4</sup>. Apoplastic IPs are sensed by plant plasma membrane-localized receptor kinases (RKs) or  
21 receptor-like proteins (RLPs) that function as pattern recognition receptors (PRRs)<sup>5,6</sup>. Activation of the immune  
22 response requires the recruitment of regulatory receptor kinases and receptor-like cytoplasmic kinases (RLCKs)  
23 by PRRs<sup>7</sup>. Early cellular immune signaling of pattern-triggered immunity (PTI) includes ion-flux changes at the  
24 plasma membrane, rise in cytosolic  $Ca^{2+}$  levels, production of extracellular reactive oxygen species (ROS) and  
25 activation of mitogen-activated protein kinases (MAPKs) and/or  $Ca^{2+}$ -dependent protein kinases<sup>3,8-10</sup>.  
26 Biosynthesis and mobilization of plant hormones, including salicylic acid, jasmonic acid, ethylene, abscisic acid  
27 and brassinosteroids, ultimately modulate plant resistance to phytopathogens<sup>11-13,14</sup>.

28 Rhamnolipids (RLs) are extracellular amphiphilic metabolites produced by several bacteria, especially  
29 *Pseudomonas* and *Burkholderia* species<sup>15-17</sup>. Acting as wetting agents, RLs are essential for the social form of  
30 bacterial surface dissemination called swarming motility and for normal biofilm development<sup>18-20</sup>. These  
31 glycolipids are produced from L-rhamnose and 3-(3-hydroxyalkanoyloxy)alkanoic acid (HAA) precursors<sup>15,21</sup>.  
32 HAAs are synthesized by dimerization of (*R*)-3-hydroxyalkanoyl-CoA in *Pseudomonas*, forming congeners  
33 through the RhIA enzyme<sup>21</sup>. The opportunistic plant pathogen *Pseudomonas aeruginosa* and the phytopathogen  
34 *Pseudomonas syringae* produce extracellular HAAs<sup>16,22-24</sup>. In *P. syringae*, HAA synthesis is coordinately  
35 regulated with the late-stage flagellar gene encoding flagellin<sup>22</sup>. HAA and RL production is finely tuned and  
36 modulates the behavior of swarming migrating bacterial cells by acting as self-produced negative and positive  
37 chemotactic-like stimuli<sup>25</sup>. RLs contribute to the alteration of the bacterial outer membrane composition, by  
38 shedding flagellin from the flagella<sup>26</sup> and by releasing lipopolysaccharides (LPS) resulting in an increased  
39 hydrophobicity of the bacterial cell surface<sup>27</sup>. In mammalian cells, RLs produced by *Burkholderia plantarii* exhibit  
40 endotoxin-like properties similar to LPS, leading to the production of proinflammatory cytokines in human  
41 mononuclear cells<sup>28,29</sup>. They also subvert the host innate immune response through manipulation of the human  
42 beta-defensin-2 expression<sup>30</sup>. Moreover, RLs from *Burkholderia pseudomallei* induce Interferon gamma (IFN-  
43  $\gamma$ )-dependent host immune response in goat<sup>31</sup>.

44 In plants, RLs induce defense responses and resistance to biotrophic and necrotrophic pathogens<sup>32,33</sup>.  
45 They also contribute to the biocontrol activity of the plant beneficial bacterium *P. aeruginosa* PNA1 against  
46 oomycetes<sup>17</sup>. Recently, it was reported that the bulb-type lectin receptor kinase LIPOOLIGOSACCHARIDE-  
47 SPECIFIC REDUCED ELICITATION/S-DOMAIN-1-29 (LORE/SD1-29) mediates medium-chain 3-hydroxy fatty  
48 acid (mc-3-OH-FA) sensing in *Arabidopsis thaliana* (hereafter, *Arabidopsis*) and that bacterial compounds  
49 comprising mc-3-OH-acyl building blocks including LPS and RLs do not stimulate LORE-dependent responses<sup>34</sup>.

50 Here we show that the lipidic secretome produced by *P. aeruginosa* (RLsec), composed of RLs, HAAs  
51 and mc-3-OH-FAs, induces *Arabidopsis* immunity. HAAs are perceived through the RK LORE. We demonstrate  
52 that, albeit not being sensed by LORE, RLs trigger an immune response characterized by an atypical defense  
53 signature. Altogether, our results demonstrate that RLs and their precursors produced by *Pseudomonas*  
54 bacteria stimulate the plant immune response by two distinct mechanisms.

55

## 56 Results

### 57 RLsec from *Pseudomonas* induces *Arabidopsis* immune responses partially mediated by LORE.

58 *Pseudomonas* species including opportunistic plant pathogenic or plant beneficial endophytic strains release a  
59 mixture of RL congeners and HAA precursors, here collectively termed RL secretome (RLsec)<sup>15,25</sup>. HPLC-  
60 MS/MS analyses of this RLsec from *P. aeruginosa* revealed the presence of mono-RLs and di-RLs at 50.9%  
61 and 44.9% of dry weight, respectively, and HAAs (3.8% of dry weight) (Supplementary Table 1). RLs comprising  
62 ten-carbon long lipid tails, Rha-C<sub>10</sub>-C<sub>10</sub> ( $\alpha$ -L-rhamnopyranosyl- $\beta$ -hydroxydecanoyl- $\beta$ -hydroxydecanoate) and  
63 Rha-Rha-C<sub>10</sub>-C<sub>10</sub> ( $\alpha$ -L-rhamnopyranosyl- $\alpha$ -L-rhamnopyranosyl- $\beta$ -hydroxydecanoyl- $\beta$ -hydroxydecanoate), and  
64 C<sub>10</sub>-C<sub>10</sub> [(*R*)-3-(((*R*)-3-hydroxydecanoyl)oxy)decanoate] HAAs were the most abundant molecules in this lipidic  
65 secretome (37.6%, 33.1%, 2.1%, respectively). Notably, low amounts of free mc-3-OH-FAs (0.4% total), such  
66 as 3-OH-C<sub>8</sub>, 3-OH-C<sub>10</sub> and 3-OH-C<sub>12</sub>, were also identified (Supplementary Table 1).

67 First, we monitored apoplastic ROS production triggered by RLsec in *Arabidopsis*<sup>35</sup>. Wild type (WT)  
68 plants challenged with RLsec displayed a transient extracellular ROS production, starting at six minutes and  
69 peaking at 15 minutes post elicitation (Fig. 1a). A robust ROS response was detected at concentrations of RLsec  
70 starting from 0.5  $\mu$ g/mL (Fig. 1b, Supplementary Fig. 1). The ROS burst was dependent on the transmembrane-  
71 NADPH oxidase RBOHD<sup>36,37</sup> (Fig. 1c, Supplementary Fig. 2). RKs and RLPs mediate perception of IPs and  
72 early activation of PTI signaling<sup>7</sup>. We monitored RLsec-triggered ROS production in *Arabidopsis* plants carrying  
73 loss-of-function mutations in genes encoding well characterized RKs and RLPs *fls2/efr1*<sup>38,39</sup>, *bak1-5*, *bkk1-1*,  
74 *bak1-5/bkk1-1*<sup>40</sup>, *bik1/pbl1*<sup>41</sup>, *cerk1-2*<sup>42</sup>, *sobir1-12*, *sobir1-13*<sup>43</sup>, *dorn1-1*<sup>44</sup> and *lore-5*<sup>45</sup>. RLsec-induced  
75 production of ROS was only reduced in *lore-5* (Fig. 1c, Supplementary Fig. 2). Some IPs, including LPS extracts  
76 and synthetic mc-3-OH-FAs, were reported to induce a late ROS production in *Arabidopsis*<sup>34,46,47</sup>. The late ROS  
77 response triggered by mc-3-OH-FAs was dependent on LORE<sup>34</sup>. RLsec also induced a late and long-lasting  
78 ROS burst in *Arabidopsis* culminating at 6-8 hours post treatment (Fig. 2a), which was abolished in *rbohD* but  
79 not in *lore-5* mutant plants (Fig. 2a).

80 Next, we tested whether RLsec induces local resistance to the hemibiotrophic phytopathogen  
81 *Pseudomonas syringae* pv. *tomato* DC3000 (*Pst*) in *Arabidopsis*<sup>48</sup>. RLsec pretreatment significantly enhanced  
82 resistance against *Pst* infection in WT leaves and, although less pronounced, in *lore-5* plants (Fig. 2b). Taken  
83 together, our results show that RLsec induces immunity-related signaling events and disease resistance in  
84 *Arabidopsis* that are partially mediated by the bulb-type lectin RK LORE.

85

### 86 *Pseudomonas* HAAs and mc-3-OH-FAs from RLsec trigger LORE-dependent *Arabidopsis* immunity.

87 By contrast to RLsec, purified RLs do not trigger LORE-dependent [Ca<sup>2+</sup>]<sub>cyt</sub> and early ROS signaling  
88 responses<sup>34</sup>. Because RLsec contains significant amounts of HAAs, we investigated the role of these poorly  
89 studied compounds in RLsec-triggered immunity. We compared the responses to HAA with those to mc-3-OH-  
90 FAs, known to be sensed by LORE<sup>34</sup> and present in low amounts in RLsec (Supplementary table 1). Side-by-  
91 side experiments with C<sub>10</sub>-C<sub>10</sub> HAA purified from *Pseudomonas aeruginosa* secretome and 3-OH-C<sub>10</sub> revealed  
92 that both compounds induce [Ca<sup>2+</sup>]<sub>cyt</sub> signaling and ROS production in WT plants in a dose-dependent manner  
93 (Fig. 3a and 3b, Supplementary Fig. 3 and 4). As observed upon 3-OH-C<sub>10</sub> elicitation, purified C<sub>10</sub>-C<sub>10</sub>-induced  
94 ROS response was impaired in *rbohD* and *lore-5* mutants (Fig. 3c). Similarly, [Ca<sup>2+</sup>]<sub>cyt</sub> signaling triggered by  
95 C<sub>10</sub>-C<sub>10</sub> was impaired in *lore-5* (Fig. 3d). In addition, C<sub>10</sub>-C<sub>10</sub> and 3-OH-C<sub>10</sub> both triggered LORE-dependent

96 MPK3 and MPK6 phosphorylation (Supplemental Fig. 5a). C<sub>10</sub>-C<sub>10</sub> activated a late and long-lasting ROS  
97 production which, unlike the RL-triggered ROS burst, was LORE-dependent (Supplemental Fig. 6). WT but not  
98 *lore-5* mutant plants pretreated with C<sub>10</sub>-C<sub>10</sub> or 3-OH-C<sub>10</sub> displayed enhanced resistance against *Pst* (Fig. 3e).  
99 Similar to 3-OH-FAs<sup>36</sup>, the acyl chain length of HAA affects its immune eliciting activity, as purified C<sub>14</sub>-C<sub>14</sub> from  
100 *B. glumae* did not induce ROS production in *Arabidopsis* plants (Supplementary Fig. 7).

101 Trace amount of 3-OH-C<sub>10</sub> was detected in C<sub>10</sub>-C<sub>10</sub> purified from *P. aeruginosa* RLsec (Supplementary  
102 Table 2). To avoid any influence of potential contamination of HAAs with eliciting compounds related to  
103 purification procedure, we tested chemically synthesized C<sub>10</sub>-C<sub>10</sub> for the ROS and [Ca<sup>2+</sup>]<sub>cyt</sub> responses. Synthetic  
104 C<sub>10</sub>-C<sub>10</sub> triggered LORE-dependent [Ca<sup>2+</sup>]<sub>cyt</sub> signaling and ROS production in a dose-dependent manner (Fig.  
105 4a-c). WT plants pretreated with synthetic C<sub>10</sub>-C<sub>10</sub> also displayed LORE-dependent enhanced resistance  
106 against *Pst* infection (Fig. 4d).

107 Altogether, our results show that HAAs secreted by *Pseudomonas* are sensed by *Arabidopsis* through  
108 the bulb-type lectin RK LORE, activate canonical PTI-related immune responses and provide resistance to  
109 bacterial infection.

110

### 111 **RLs trigger LORE-independent *Arabidopsis* immune responses and resistance to *Pst*.**

112 To investigate whether RLs activate a LORE-independent immune response, we used purified Rha-  
113 Rha-C<sub>10</sub>-C<sub>10</sub> and Rha-C<sub>10</sub>-C<sub>10</sub>, the most abundant molecules from *P. aeruginosa* RLsec. In *Arabidopsis* WT,  
114 both RL congeners induced a late and long-lasting ROS production, but as observed previously<sup>34</sup>, no early burst  
115 (Fig. 5a). As both RL congeners gave a similar ROS signature, we only used Rha-Rha-C<sub>10</sub>-C<sub>10</sub> in the following  
116 experiments. The minimal concentration necessary to stimulate ROS production was 50 μM with an optimum  
117 at 100 μM (Fig. 5b). Late ROS production was compromised in *rbohD* but not in *lore-5* mutants (Fig. 5c).  
118 Surprisingly, neither MPK3 nor MPK6 activation by Rha-Rha-C<sub>10</sub>-C<sub>10</sub> was detectable over a 3-hour time-course  
119 (Supplementary Fig. 5b). L-Rhamnose alone was inactive demonstrating that the lipid part of the RLs is  
120 necessary to trigger the immune response (Fig. 5a). *Burkholderia* species produce RL congeners with longer  
121 lipid chains than those produced by *Pseudomonas*<sup>15</sup>. The RLsec from phytopathogenic *Burkholderia glumae*  
122 only contains congeners with fatty acid chain lengths varying from 12 to 16 carbons, in particular Rha-Rha-C<sub>14</sub>-  
123 C<sub>14</sub><sup>49,50</sup>. Challenge of *Arabidopsis* with purified Rha-Rha-C<sub>14</sub>-C<sub>14</sub> from *B. glumae* did not trigger any ROS  
124 production (Fig. 5a) suggesting that the length of the fatty acid chain of RLs is critical for their eliciting activity.  
125 To determine whether RLs trigger local resistance to pathogenic *Pseudomonas* independent of LORE, plants  
126 were pretreated with 10 μM purified Rha-Rha-C<sub>10</sub>-C<sub>10</sub> before *Pst* inoculation. WT plants displayed a significant  
127 enhanced resistance against *Pst* that was not compromised in *lore-5* mutants (Fig. 5d).

128 To get deeper insights into the mechanisms involved in RL sensing, we used *Arabidopsis* plants carrying  
129 loss-of-function mutations in genes encoding RK and RLPs but also plasma membrane channel mutants  
130 including quintuple mechano-sensitive channels of small conductance-like (*msl4/5/6/9/10*) and double mid1-  
131 complementing activity (*mca1/2*) channel mutants<sup>51</sup> that could monitor changes in membrane mechanical  
132 properties. None of these mutants were affected in the long-term ROS response (Fig. 6a). Glycosylinositol  
133 phosphorylceramide (GIPC) sphingolipids were recently involved in the sensing of microbial necrosis and  
134 ethylene-inducing peptide 1-like (NLP) proteins<sup>52</sup>. We found that the fatty acid hydroxylase *fah1/2* mutant that  
135 is disturbed in its complex sphingolipid composition<sup>52</sup> showed a reduced long-term ROS response (Fig. 6b). Ion

136 leakage measurement confirmed that *fah1/2* mutant plants were less affected than WT plants by RL treatment  
137 (Fig. 6c). Ceramide synthase *loh1* mutants are also impaired in GIPC levels but not in glucosyl ceramides<sup>52</sup>.  
138 Interestingly, RL-triggered ROS production and ion leakage was unaltered in *loh1* plants. Altogether, our results  
139 show that RLs activate an atypical immune response in *Arabidopsis* that is LORE-independent, but which is  
140 affected by the sphingolipid composition of the plasma membrane.

141

## 142 Discussion

143 In *Pseudomonas* and *Burkholderia* species, swarming motility is intimately related to the production of  
144 extracellular surface-active RLs and HAAs<sup>22,25,53-55</sup>. In addition, RL production affects bacterial biofilm  
145 architecture and increases affinity of cells for initial adherence to surfaces through increasing the cell's surface  
146 hydrophobicity<sup>19,56</sup>. These exoproducts are therefore at the frontline during host colonization. Our work  
147 demonstrates that both RLs and HAAs from the *Pseudomonas* lipidic secretome, referred to as RLsec here, are  
148 able to trigger *Arabidopsis* innate immunity by two distinct mechanisms.

149 We found that *Pseudomonas* RLs induce an atypical immune response. This response does not involve  
150 the RK LORE. Other bacterial compounds comprising mc-3-OH-acyl building blocks, but with large decorations  
151 including lipid A or LPS, lipopeptides, and *N*-acyl homoserine lactones also do not trigger LORE-dependent  
152 immune responses<sup>34</sup>. RLs are glycolipids made of L-rhamnose linked to an HAA lipid tail<sup>15,21</sup>. Therefore,  
153 glycosylation of HAAs abolishes their perception by LORE. Glycosylation is known to affect the perception of  
154 IPs. Glycosylation of flg22 from *Acidovorax avenae* on Ser<sup>178</sup> and Ser<sup>183</sup> prevents its perception by rice cell<sup>57</sup>.  
155 Similarly, unglycosylated flagellin from *Pseudomonas syringae* pv. *tabaci* 6605 induces stronger defense  
156 responses in tobacco plants than glycosylated flagellin<sup>58</sup>. In humans, glycosylation of *Burkholderia cenocepacia*  
157 flagellin significantly reduces its perception by epithelial cells<sup>59</sup>.

158 We found that RL perception does not involve previously characterized RKs, RLPs or mechanosensitive  
159 channels. However, the RL response is affected by alterations in sphingolipid synthesis suggesting a role of  
160 these key membrane lipids in RL-triggered immunity. Recently GIPCs, major structural components of the plant  
161 plasma membrane together with glucosylceramides (GlcCers), have been involved as receptors of cytotoxic  
162 NLPs<sup>52</sup>. NLPs bind terminal monomeric hexose moieties of GIPCs. Only eudicot plants are sensing these NLPs  
163 through sphingolipid receptors. Insensitivity of monocots to NLPs is due to the length of the GIPC headgroup,  
164 consisting of three terminal hexoses compared to two in eudicots<sup>52</sup>. *fah1/2* mutants display reduced  
165 glycosylsphingolipids (GIPCs and GlcCers) content but also lower level of ordered plasma membranes<sup>52</sup>,  
166 suggesting that, similar to the NLP response, complex sphingolipids and/or ordered plasma membranes are  
167 necessary for the RL response. Unlike NLPs, RL responses were not significantly affected in *loh1* mutant plants  
168 also suggesting that GlcCers more than GIPC could influence RL sensing<sup>52</sup>. Surfactin and more recently  
169 synthetic RL bolaforms and synthetic glycolipids, also active in the micromolar range, have been proposed to  
170 directly interact with plasma membrane lipids<sup>46,60-62</sup>. Mono- and di-RLs from *Pseudomonas* interact with  
171 phospholipids in several model membranes<sup>63-66</sup>. In particular, RLs are able to fit into phospholipid bilayers of  
172 plant membrane model<sup>67</sup>. In this model, the rhamnose polar heads from RLs are located near the phosphate  
173 groups from phospholipids and RL hydrophobic lipid tails are surrounded by the lipid chains from these  
174 phospholipids<sup>67</sup>. The results obtained with these plant plasma membrane models suggest that the insertion of  
175 RLs into the lipid bilayer does not significantly affect lipid dynamics. The nature of the phytosterols could

176 however influence the RL effect on plant plasma membrane destabilization. Subtle changes in lipid dynamics  
177 could then be linked to plant defense induction<sup>67</sup>. Interestingly, RL bolaforms, like natural RLs are inducing a  
178 non-canonical defense signature with a long-lasting oxidative burst without MPK3 or MPK6 activation<sup>46</sup>. This  
179 atypical defense signature triggered by two structurally different RLs, displaying amphiphilic properties and  
180 biological activities at the micromolar range, could suggest a direct interaction of these molecules with plant  
181 plasma membrane lipids.

182 We also demonstrated that HAAs, found in large amount in *Pseudomonas* lipidic secretome, are IPs  
183 perceived by *Arabidopsis*. HAA sensing is mediated by LORE<sup>34</sup>. HAAs, in the micromolar range, induce typical  
184 PTI responses including transient ROS production,  $[Ca^{2+}]_{cyt}$  signaling, and MPK3 and MPK6 phosphorylation in  
185 *Arabidopsis*. Interestingly, 3-OH-C<sub>10</sub> activates similar responses but at concentrations 10 to 50 times lower. This  
186 is intriguing, because HAAs are present in much larger quantities (more than 3%) compared to 3-OH-FAs (0.3%)  
187 in the lipid secretome (Supplemental table 1). This high amount of HAAs could therefore compensate for their  
188 lower activity. RLs are activating an immune response at relatively high concentrations compared to both  
189 compounds. Interestingly, the RL concentration in the *P. aeruginosa* lipidic secretome is 10 to 100 times higher  
190 than HAAs and usually in the millimolar range<sup>23,68</sup>. RLs are produced between 20 and 110  $\mu$ M *in vivo* in  
191 mammals infected by *P. aeruginosa*, especially during cystic fibrosis disease<sup>69-71</sup>. The high concentrations of  
192 RLs needed for plant elicitation are in the range of the concentrations produced by the bacteria.

193 Higher steric hindrance of HAA compared to 3-OH-FAs likely results in a lower affinity to the LORE  
194 receptor. Synthetic ethyl 3-hydroxydecanoate (Et-3-OH-C<sub>10:0</sub>) and *n*-butyl 3-hydroxydecanoate (*n*But-3-OH-  
195 C<sub>10:0</sub>), which possess unbranched ester-bound carbon chains in place of the carboxyl group, also triggered  
196 LORE-dependent immune signaling in *Arabidopsis*, while 3-branched *tert*-butyl 3-hydroxydecanoate (*t*But-3-  
197 OH-C<sub>10:0</sub>) was inactive<sup>34</sup>. HAAs, possessing a 2-branched ester-bound headgroup, activate LORE signaling.  
198 The differences in efficacy could be explained by the different steric hindrance of the molecules. Alternatively,  
199 the additional carboxyl group could account for the LORE-eliciting activity of HAAs.

200 *Pantoea*, *Dickeya* and *Pseudomonas* bacteria, in particular the well-known phytopathogen *P. syringae*  
201 mainly produce HAAs containing 3-hydroxydecanoic acid (C<sub>10</sub>) tails<sup>15,22,72</sup>. By contrast, *Burkholderia* species  
202 including the phytopathogenic bacterium *B. glumae*, mainly produce HAAs comprising 3-hydroxytetradecanoic  
203 acid (C<sub>14</sub>) tails<sup>49</sup>. *Pseudomonas* C<sub>10</sub>-containing HAAs activated *Arabidopsis* PTI whereas *Burkholderia* HAAs  
204 containing C<sub>14</sub> fatty acid did not. Chain-length specificity was also observed for mc-3-OH-FA sensing by the  
205 LORE receptor with 3-OH-C<sub>10</sub> representing the strongest immune elicitor<sup>34</sup>. Thus, it could be hypothesized that  
206 *Arabidopsis*, and more generally *Brassicaceae*<sup>73</sup> are able to specifically recognize HAAs from specific bacterial  
207 species, among which several are plant opportunistic and phytopathogens<sup>74-77</sup>. Interestingly, transcript profiles  
208 of the bean pathogen *P. syringae* pv. *syringae* B728a support a model in which leaf surface or epiphytic sites  
209 specifically favor swarming motility based on HAA surfactant production<sup>55,78</sup>. Low levels of HAAs contributing to  
210 motility are produced by these bacteria<sup>22</sup>. HAA concentrations necessary to stimulate *Arabidopsis* innate  
211 immunity are in line with the concentration detected in RLsec and are produced by *Pseudomonas* (between 3  
212 to 20% of the secretome)<sup>23,68,79</sup>.

213 Low amounts of free mc-3-OH-FAs were found in RLsec from *P. aeruginosa* (Supplementary table 1).  
214 In *Pseudomonas*, the outer membrane lipase PagL releases 3-OH-C<sub>10</sub> during synthesis of penta-acylated lipid  
215 A<sup>34</sup>. The further fate of this 3-OH-C<sub>10</sub> is unknown. RLs are able to extract LPS from the outer membrane of *P.*

216 *aeruginosa*<sup>27</sup>. Conceivably, surface-active RLs, and presumably also HAAs, could release free 3-OH-C<sub>10</sub>,  
217 produced through PagL activity, along with LPS from the bacterial cell wall or outer membrane vesicles<sup>27</sup>.  
218 Alternatively, degradation of HAAs/RLs *in planta* may also release free 3-OH-C<sub>10</sub>. Acyl carrier protein (ACP)-  
219 and coenzyme A (CoA)-bound mc-3-OH-FAs are precursors of HAA/RL synthesis<sup>21</sup>. Upon bacterial cell lysis,  
220 enzymatic or non-enzymatic degradation processes may also generate free 3-OH-C<sub>10</sub> from these precursors.  
221 *In vivo*, insights into IP release have been recently obtained for flagellin. The plant glycosidase BGAL1 facilitates  
222 the release of immunogenic peptides from glycosylated flagellin, upstream of cleavage by proteases<sup>80</sup>. The  
223 pathogen may evade detection by altering flagellin glycosylation and inhibiting the plant glycosidase. Flagellin  
224 glycosylation increases its physical stability that could contribute to the non-liberation/recognition of the flg22  
225 epitope<sup>58,81</sup>. RLs are able to shed flagellin from *P. aeruginosa* flagella<sup>26</sup>, suggesting that these biosurfactants  
226 participate in the release of this and presumably other eliciting compounds.

227 In conclusion, we hypothesize that when HAA- and RL-producing *Pseudomonas* colonize the leaf or  
228 root surface, they release RLs and HAAs which are necessary for surface motility, biofilm development, and  
229 thus successful colonization. Whereas *Arabidopsis* senses HAAs and mc-3-OH-FAs through the bulb-type lectin  
230 receptor kinase LORE, RLs are perceived through a LORE-independent mechanism. In addition to direct  
231 activation of a non-canonical defense response in plants, RLs, by releasing other IPs from bacteria, could  
232 orchestrate a node leading to strong activation of plant immunity.

233

234

## 235 **Methods**

236 **Molecules.** The *P. aeruginosa* lipidic secretome used in this study was obtained from Jeneil Biosurfactant Co.,  
237 Saukville, USA (JBR-599, lot. #050629). Rha-Rha-C<sub>10</sub>-C<sub>10</sub> and Rha-C<sub>10</sub>-C<sub>10</sub> were purified from this lipidic  
238 secretome mixture, as previously described<sup>33,34</sup>. Rha-Rha-C<sub>14</sub>-C<sub>14</sub> were purified from the *B. glumae* lipidic  
239 secretome<sup>49</sup>. To obtain pure HAAs from *P. aeruginosa* or *B. glumae*, RLs were hydrolyzed using 1 M HCl in 1:1  
240 dioxane-water boiling at reflux for 60 min. The mixture was extracted with ethyl acetate and the extracts were  
241 dried over anhydrous Na<sub>2</sub>SO<sub>4</sub>. After filtration, the resulting extracts were then evaporated to dryness and  
242 resuspended in 2 mL of methanol. HAAs were then isolated from digested mixture using flash chromatography  
243 on a Biotage (Stockholm, Sweden) Isorela One instrument with a SNAP Ultra C18 12g column (Biotage) using  
244 an acetonitrile/water gradient at 12 mL/min flow rate. The elution was started with 0% acetonitrile for 4.5 min  
245 and the acetonitrile concentration was raised to 100% over 28.2 min, followed by an isocratic elution of 100%  
246 acetonitrile for 13.3 min. The flash chromatography fraction containing the C<sub>10</sub>-C<sub>10</sub> was further separated and  
247 purified using 0.25 mm thin-layer chromatographic (TLC) plates (SiliCycle SilicaPlate F-254) and developed  
248 with *n*-hexane-ethyl acetate-acetic acid (24:74:2). The bands were scraped from the plates and the HAAs,  
249 including C<sub>10</sub>-C<sub>10</sub>, were extracted from the silica with chloroform-methanol (5:1). 3-OH-C<sub>10</sub> was purchased from  
250 Sigma-Aldrich Saint-Quentin Fallavier, France. All compounds were dissolved in ethanol or methanol as  
251 indicated to prepare stock solutions. Final aqueous compound dilutions were prepared freshly on the days of  
252 the experiment. Control solutions contained equal amounts of ethanol or methanol (0.05% for most experiments  
253 and not exceeding 0.5% for the highest concentrations tested). Chemical synthesis of C<sub>10</sub>-C<sub>10</sub> is described in  
254 supplementary data 1 and 2.

255

256 **LC-MS analysis of HAAs.** Samples were prepared by diluting stock solutions using MeOH to final concentration  
257 of 50 ppm. 16-Hydroxyhexadecanoic acid at 20 ppm was added to samples as internal standard<sup>71</sup>. The analyses  
258 were performed with a Quattro II triple quadrupole mass spectrometer (Micromass, Pointe-Claire, Canada)  
259 equipped with a Z-spray interface using electrospray ionization in negative mode. The capillary voltage was set  
260 at 3.5 kV and the cone voltage at 25 V. The source temperature was kept at 120°C and the desolvation gas at  
261 150°C. The scanning mass range was from 130 to 930 Da. The instrument was interfaced to a high-performance  
262 liquid chromatograph (HPLC; Waters 2795, Mississauga, Ontario, Canada) equipped with a 100 x 4 mm i.d.  
263 Luna Omega PS C18 reversed-phase column (particle size 5 µm) using a water-acetonitrile gradient with a  
264 constant 2 mmol L<sup>-1</sup> concentration of ammonium acetate (0.6 mL.min<sup>-1</sup>). Quantification of free 3-OH-C<sub>10</sub> in  
265 purified C<sub>10</sub>-C<sub>10</sub>, Rha-Rha-C<sub>10</sub>-C<sub>10</sub>, Rha-C<sub>10</sub>-C<sub>10</sub>, Rha-Rha-C<sub>14</sub>-C<sub>14</sub> or synthetic C<sub>10</sub>-C<sub>10</sub> were performed as  
266 reported previously<sup>34</sup> and are presented in Supplementary table 2.

267

268 **Plant material and growth conditions.** *Arabidopsis thaliana* ecotype Col-0 was used as WT parent for all  
269 experiments. Seeds from *fls2/efr1*<sup>38,39</sup>, *bak1-5*, *bkk1-1*, *bak1-5/bkk1-1*<sup>40</sup>, *cerk1-2*<sup>42</sup>, *bik1/pbl1*<sup>41</sup>, *rbohD*,  
270 *msl4/5/6/9/10* and *mca1/2*<sup>51</sup> were provided by C. Zipfel. Seeds from *sobir1-12* and *sobir1-13*<sup>43</sup> were provided  
271 by F. Brunner (Center for Plant Molecular Biology, University of Tübingen, Tübingen, PlantResponse™). Seeds  
272 from *sd1-29 (lore-5)*, Col-0<sup>AEQ</sup> and *lore-5*<sup>AEQ</sup> were provided by S. Ranf<sup>45</sup>. *loh1* and *fah1/2* seed<sup>52</sup> were provided  
273 by I. Feussner (University of Göttingen, Germany). *dorn1-1* seeds<sup>44</sup> were obtained from NASC stock  
274 (SALK\_042209). All mutants are in the Col-0 background. Plants were grown on soil in growth chambers at  
275 20°C, under 12 h light / 12 h dark regime with fluorescent light of 150 µmol m<sup>-2</sup> s<sup>-1</sup> and 60% relative humidity.

276

277 **Extracellular ROS production and calcium signaling.** ROS assays were performed on 4- to 6-week-old  
278 *Arabidopsis* plants cultured on soil. Briefly, 5 mm long petiole sections were cut and placed in 150 µL of distilled  
279 water overnight in 96 wells plate (PerkinElmer)<sup>46</sup>. Then, the protocol was conducted as previously described<sup>82</sup>.  
280 Luminescence (relative light units, RLU) was measured every 2 min during 46 or 720 min with a Tecan Infinite  
281 F200 PRO (or a TECAN CM SPARK for Supplementary figure 6), Tecan France. Total ROS production was  
282 calculated by summing RLU measured between 4 to 46 or 4 to 720 minutes after treatment. Control was realized  
283 on petioles of WT or mutant plants. [Ca<sup>2+</sup>]<sub>cyt</sub> measurements were done as previously described<sup>34</sup>.

284

285 **MAPK phosphorylation assays.** For MAPK phosphorylation assays, 3 leaf disks (9 mm diameter) were  
286 collected from 4 to 6-week-old *Arabidopsis* plants grown on soil and incubated 8 h in distilled water. Leaf disks  
287 were mock-treated or treated with different molecules. 15 min, 1 hour, and 3 hours after treatment, plant tissues  
288 were frozen in liquid nitrogen. To extract proteins, 60 mg of leaf tissues were ground in a homogenizer Potter-  
289 Elvehjem with 60 µL of extraction buffer (0.35 M Tris-HCl (pH 6.8), 30% (v/v) glycerol, 10% (v/v) SDS, 0.6 M  
290 DTT, 0.012% (w/v) bromophenol blue). Total protein extracts were denatured for 7 min at 95°C, centrifuged at  
291 11 000g for 5 min and 30 µL of supernatant were separated by 12% SDS-PAGE. Proteins were transferred onto  
292 PVDF membranes for 10 min at 25 V using iBLOT gel transfer system (Invitrogen). After 30 min in 5% saturation  
293 solution (50 g L<sup>-1</sup> milk, TBS (137 mM NaCl, 2.7 mM KCl, 25 mM Tris-HCl), Tween20 0.05% (v/v)) and 3 times 5  
294 min in 0.5% washing solution (5 g L<sup>-1</sup> milk, TBS (137 mM NaCl, 2.7 mM KCl, 25 mM Tris-HCl), Tween 20 0.05%  
295 (v/v)), membranes were incubated overnight with rabbit polyclonal primary antibodies against phospho-p44/42



296 MAPK (Erk1/2) (Cell Signaling, 1:2000) at 4°C. Then, membranes were washed 3 times 5 min with washing  
297 solution and incubated 1 h with anti-rabbit IgG HRP-conjugated secondary antibodies (Bio-Rad, 1:3000) at room  
298 temperature. Finally, washed membranes were developed with SuperSignal® West Femto using an odyssey  
299 scanner (ODYSSEY® Fc Dual-Mode Imaging System, LI-COR). To normalize protein loading, membranes were  
300 stripped 15 min with 0.25 M NaOH, blocked 30 min in 5% non-fat milk. Then, membranes were incubated at  
301 room temperature for 1 h with plant monoclonal anti-actin primary antibodies (CusAb, 1:1000) and 1 h with anti-  
302 mouse IgG HRP-conjugated secondary antibodies (Cell Signaling, 1:3000). Membranes were washed and  
303 developed as described above.

304

305 **Conductivity assay.** The assay was performed as described previously<sup>83</sup>, with few modifications. Eight leaf  
306 discs of 6-mm-diameter were incubated in distilled water overnight. One disc was transferred into 1.5 mL tube  
307 containing fresh distilled water and the corresponding elicitor concentration or ethanol for control. Conductivity  
308 measurements (three to four replicates for each treatment) were then conducted using a B-771 LaquaTwin  
309 (Horiba) conductivity meter.

310

311 ***Pseudomonas syringae* culture and disease resistance assays.** *Pseudomonas syringae* pv. *tomato* strain  
312 DC3000 was grown at 28°C under stirring in King's B (KB) liquid medium supplemented with antibiotics: 50 µg  
313 mL<sup>-1</sup> of rifampicin and 50 µg mL<sup>-1</sup> of kanamycin. For local protection assays, 15 seeds were sown per pot and  
314 grown for 3 to 5 weeks in soil. Plants were sprayed with molecules or ethanol as control and were placed two  
315 days in high humidity atmosphere before infections. Plants were inoculated by spraying the leaves with 3 mL of  
316 a bacterial suspension at an optical density (OD<sub>600</sub>) of 0.01 (0.025 % Silwet L-77, 10 mM MgCl<sub>2</sub>). Quantification  
317 (colony forming units) of *in planta* bacterial growth was performed 3 dpi. To this end, all plant leaves from the  
318 same pot were harvested, weighed, and crushed in a mortar with 10 mL of 10 mM MgCl<sub>2</sub> and serial dilutions  
319 were performed. For each dilution, 10 µL were dropped on KB plate supplemented with appropriate antibiotics.  
320 Colony forming units (CFU) were counted after 2 days of incubation at 28°C. The number of bacteria per mg of  
321 plants fresh mass was obtained with the formula:

322

$$323 \quad \text{CFU.mg}^{-1} = \frac{\left( \frac{N \times V_d}{V_i} \times 10^{(n-1)} \times 100 \right)}{M}$$

324

325 with N equal to CFU number, V<sub>i</sub> the volume depot on plate, V<sub>d</sub> the total volume, n the dilution number and M  
326 the plants fresh mass.

327

## 328 **References**

329

- 330 1. Cook, D. E., Mesarich, C. H. & Thomma, B. P. Understanding plant immunity as a surveillance system  
331 to detect invasion. *Annu. Rev. Phytopathol.* **53**, 541-563 (2015).
- 332 2. Kanyuka, K. & Rudd, J. J. Cell surface immune receptors: the guardians of the plant's extracellular  
333 spaces. *Curr. Opin. Plant Biol.* **50**, 1-8 (2019).
- 334 3. Boller, T. & Felix, G. A renaissance of elicitors: perception of microbe-associated molecular patterns  
335 and danger signals by pattern-recognition receptors. *Annu. Rev. Plant Biol.* **60**, 379-406 (2009).

- 336 4. Newman, M. A., Sundelin, T., Nielsen, J. T. & Erbs, G. MAMP (microbe-associated molecular pattern)  
337 triggered immunity in plants. *Front. Plant Sci.* **4**, 139 (2013).
- 338 5. Boutrot, F. & Zipfel, C. Function, discovery, and exploitation of plant pattern recognition receptors for  
339 broad-spectrum disease resistance. *Annu. Rev. Phytopathol.* **55**, 257-286 (2017).
- 340 6. Ranf, S. Sensing of molecular patterns through cell surface immune receptors. *Curr. Opin. Plant Biol.*  
341 **38**, 68-77 (2017).
- 342 7. Couto, D. & Zipfel, C. Regulation of pattern recognition receptor signalling in plants. *Nat. Rev. Immunol.*  
343 **16**, 537-552 (2016).
- 344 8. Bigeard, J., Colcombet, J. & Hirt, H. Signaling mechanisms in pattern-triggered immunity (PTI). *Mol.*  
345 *Plant* **8**, 521-539 (2015).
- 346 9. Garcia-Brugger, A. *et al.* Early signaling events induced by elicitors of plant defenses. *Mol. Plant-*  
347 *Microbe Interact.* **19**, 711-724 (2006).
- 348 10. Wu, S., Shan, L. & He, P. Microbial signature-triggered plant defense responses and early signaling  
349 mechanisms. *Plant Sci.* **228**, 118-126 (2014).
- 350 11. De Vleeschauwer, D., Gheysen, G. & Hofte, M. Hormone defense networking in rice: tales from a  
351 different world. *Trends Plant Sci.* **18**, 555-565 (2013).
- 352 12. Robert-Seilaniantz, A., Grant, M. & Jones, J. D. Hormone crosstalk in plant disease and defense: more  
353 than just jasmonate-salicylate antagonism. *Annu. Rev. Phytopathol.* **49**, 317-343 (2011).
- 354 13. Trda, L. *et al.* Perception of pathogenic or beneficial bacteria and their evasion of host immunity: pattern  
355 recognition receptors in the frontline. *Front. Plant Sci.* **6**, 219 (2015).
- 356 14. Glazebrook, J. Contrasting mechanisms of defense against biotrophic and necrotrophic pathogens.  
357 *Annu. Rev. Phytopathol.* **43**, 205-227 (2005).
- 358 15. Abdel-Mawgoud, A. M., Lépine, F. & Déziel, E. Rhamnolipids: diversity of structures, microbial origins  
359 and roles. *Appl. Microbiol. Biotechnol.* **86**, 1323-1336 (2010).
- 360 16. Irorere, V. U., Tripathi, L., Marchant, R., McClean, S. & Banat, I. M. Microbial rhamnolipid production: a  
361 critical re-evaluation of published data and suggested future publication criteria. *Appl. Microbiol.*  
362 *Biotechnol.* **101**, 3941-3951 (2017).
- 363 17. Perneel, M. *et al.* Phenazines and biosurfactants interact in the biological control of soil-borne diseases  
364 caused by *Pythium* spp. *Environ. Microbiol.* **10**, 778-788 (2008).
- 365 18. Chrzanowski, L., Lawniczak, L. & Czaczyk, K. Why do microorganisms produce rhamnolipids? *World*  
366 *J. Microbiol. Biotechnol.* **28**, 401-419 (2012).
- 367 19. Nickzad, A. & Déziel, E. The involvement of rhamnolipids in microbial cell adhesion and biofilm  
368 development - an approach for control? *Letts. Appl. Microbiol.* **58**, 447-453 (2014).
- 369 20. Vatsa, P., Sanchez, L., Clément, C., Baillieux, F. & Dorey, S. Rhamnolipid biosurfactants as new players  
370 in animal and plant defense against microbes. *Int. J. Mol. Sci.* **11**, 5095-5108 (2010).
- 371 21. Abdel-Mawgoud, A. M., Lépine, F. & Déziel, E. A stereospecific pathway diverts beta-oxidation  
372 intermediates to the biosynthesis of rhamnolipid biosurfactants. *Chem. Biol.* **21**, 156-164 (2014).
- 373 22. Burch, A. Y. *et al.* *Pseudomonas syringae* coordinates production of a motility-enabling surfactant with  
374 flagellar assembly. *J. Bacteriol.* **194**, 1287-1298 (2012).
- 375 23. Déziel, E., Lépine, F., Milot, S. & Villemur, R. *rhlA* is required for the production of a novel biosurfactant  
376 promoting swarming motility in *Pseudomonas aeruginosa*: 3-(3-hydroxyalkanoyloxy)alkanoic acids  
377 (HAAs), the precursors of rhamnolipids. *Microbiology* **149**, 2005-2013 (2003).
- 378 24. Plotnikova, J. M., Rahme, L. G. & Ausubel, F. M. Pathogenesis of the human opportunistic pathogen  
379 *Pseudomonas aeruginosa* PA14 in *Arabidopsis*. *Plant Physiol.* **124**, 1766-1774 (2000).
- 380 25. Tremblay, J., Richardson, A. P., Lépine, F. & Déziel, E. Self-produced extracellular stimuli modulate the  
381 *Pseudomonas aeruginosa* swarming motility behaviour. *Environ. Microbiol.* **9**, 2622-2630 (2007).
- 382 26. Gerstel, U., Czapp, M., Bartels, J. & Schroder, J. M. Rhamnolipid-induced shedding of flagellin from  
383 *Pseudomonas aeruginosa* provokes hBD-2 and IL-8 response in human keratinocytes. *Cell. Microbiol.*  
384 **11**, 842-853 (2009).

- 385 27. Al-Tahhan, R. A., Sandrin, T. R., Bodour, A. A. & Maier, R. M. Rhamnolipid-induced removal of  
386 lipopolysaccharide from *Pseudomonas aeruginosa*: effect on cell surface properties and interaction with  
387 hydrophobic substrates. *Appl. Environ. Microbiol.* **66**, 3262-3268 (2000).
- 388 28. Andrä, J. *et al.* Endotoxin-like properties of a rhamnolipid exotoxin from *Burkholderia (Pseudomonas)*  
389 *plantarii*: immune cell stimulation and biophysical characterization. *Biol. Chem.* **387**, 301-310 (2006).
- 390 29. Bauer, J., Brandenburg, K., Zahringer, U. & Rademann, J. Chemical synthesis of a glycolipid library by  
391 a solid-phase strategy allows elucidation of the structural specificity of immunostimulation by  
392 rhamnolipids. *Chemistry* **12**, 7116-7124 (2006).
- 393 30. Dossel, J., Meyer-Hoffert, U., Schroder, J. M. & Gerstel, U. *Pseudomonas aeruginosa*-derived  
394 rhamnolipids subvert the host innate immune response through manipulation of the human beta-  
395 defensin-2 expression. *Cell. Microbiol.* **14**, 1364-1375 (2012).
- 396 31. Gonzalez-Juarrero, M. *et al.* Polar lipids of *Burkholderia pseudomallei* induce different host immune  
397 responses. *PloS one* **8**, e80368 (2013).
- 398 32. Sanchez, L. *et al.* Rhamnolipids elicit defense responses and induce disease resistance against  
399 biotrophic, hemibiotrophic, and necrotrophic pathogens that require different signaling pathways in  
400 *Arabidopsis* and highlight a central role for salicylic acid. *Plant Physiol.* **160**, 1630-1641 (2012).
- 401 33. Varnier, A. L. *et al.* Bacterial rhamnolipids are novel MAMPs conferring resistance to *Botrytis cinerea* in  
402 grapevine. *Plant, Cell Environ.* **32**, 178-193 (2009).
- 403 34. Kutschera, A. *et al.* Bacterial medium-chain 3-hydroxy fatty acid metabolites trigger immunity in  
404 *Arabidopsis* plants. *Science* **364**, 178-181 (2019).
- 405 35. Qi, J., Wang, J., Gong, Z. & Zhou, J. M. Apoplastic ROS signaling in plant immunity. *Curr. Opin. Plant*  
406 *Biol.* **38**, 92-100 (2017).
- 407 36. Kadota, Y., Shirasu, K. & Zipfel, C. Regulation of the NADPH oxidase RBOHD during plant immunity.  
408 *Plant Cell Physiol.* **56**, 1472-1480 (2015).
- 409 37. Torres, M. A., Dangl, J. L. & Jones, J. D. *Arabidopsis* gp91phox homologues AtrbohD and AtrbohF are  
410 required for accumulation of reactive oxygen intermediates in the plant defense response. *Proc. Natl.*  
411 *Acad. Sci. USA* **99**, 517-522 (2002).
- 412 38. Chinchilla, D., Bauer, Z., Regenass, M., Boller, T. & Felix, G. The *Arabidopsis* receptor kinase FLS2  
413 binds flg22 and determines the specificity of flagellin perception. *Plant Cell* **18**, 465-476 (2006).
- 414 39. Zipfel, C. *et al.* Perception of the bacterial PAMP EF-Tu by the receptor EFR restricts *Agrobacterium*-  
415 mediated transformation. *Cell* **125**, 749-760 (2006).
- 416 40. Roux, M. *et al.* The *Arabidopsis* leucine-rich repeat receptor-like kinases BAK1/SERK3 and  
417 BKK1/SERK4 are required for innate immunity to hemibiotrophic and biotrophic pathogens. *Plant Cell*  
418 **23**, 2440-2455 (2011).
- 419 41. Li, L. *et al.* The FLS2-associated kinase BIK1 directly phosphorylates the NADPH oxidase RbohD to  
420 control plant immunity. *Cell Host Microbe* **15**, 329-338 (2014).
- 421 42. Miya, A. *et al.* CERK1, a LysM receptor kinase, is essential for chitin elicitor signaling in *Arabidopsis*.  
422 *Proc. Natl. Acad. Sci. USA* **104**, 19613-19618 (2007).
- 423 43. Zhang, W. *et al.* *Arabidopsis* receptor-like protein30 and receptor-like kinase suppressor of BIR1-  
424 1/EVERSHED mediate innate immunity to necrotrophic fungi. *Plant Cell* **25**, 4227-4241 (2013).
- 425 44. Choi, J. *et al.* Identification of a plant receptor for extracellular ATP. *Science* **343**, 290-294 (2014).
- 426 45. Ranf, S. *et al.* A lectin S-domain receptor kinase mediates lipopolysaccharide sensing in *Arabidopsis*  
427 *thaliana*. *Nat. Immunol.* **16**, 426-433 (2015).
- 428 46. Luzuriaga-Loaiza, P. *et al.* Synthetic rhamnolipid bolafoms trigger an innate immune response in  
429 *Arabidopsis thaliana*. *Sci. Rep.* **8**, 8534 (2018).
- 430 47. Shang-Guan, K. *et al.* Lipopolysaccharides trigger two successive bursts of reactive oxygen species at  
431 distinct cellular locations. *Plant Physiol.* **176**, 2543-2556 (2018).
- 432 48. Xin, X. F. & He, S. Y. *Pseudomonas syringae* pv. *tomato* DC3000: a model pathogen for probing disease  
433 susceptibility and hormone signaling in plants. *Annu. Rev. Phytopathol.* **51**, 473-498 (2013).

- 434 49. Costa, S. G., Déziel, E. & Lépine, F. Characterization of rhamnolipid production by *Burkholderia glumae*.  
435 *Letf. Appl. Microbiol.* **53**, 620-627 (2011).
- 436 50. Ham, J. H., Melanson, R. A. & Rush, M. C. *Burkholderia glumae*: next major pathogen of rice? *Mol.*  
437 *Plant Pathol.* **12**, 329-339 (2011).
- 438 51. Stephan, A. B., Kunz, H. H., Yang, E. & Schroeder, J. I. Rapid hyperosmotic-induced Ca<sup>2+</sup> responses  
439 in *Arabidopsis thaliana* exhibit sensory potentiation and involvement of plastidial KEA transporters. *Proc.*  
440 *Natl. Acad. Sci. USA* **113**, E5242-5249 (2016).
- 441 52. Lenarcic, T. *et al.* Eudicot plant-specific sphingolipids determine host selectivity of microbial NLP  
442 cytolytins. *Science* **358**, 1431-1434 (2017).
- 443 53. Caiazza, N. C., Shanks, R. M. & O'Toole, G. A. Rhamnolipids modulate swarming motility patterns of  
444 *Pseudomonas aeruginosa*. *J. Bacteriol.* **187**, 7351-7361 (2005).
- 445 54. Nickzad, A., Lépine, F. & Déziel, E. Quorum sensing controls swarming motility of *Burkholderia glumae*  
446 through regulation of rhamnolipids. *PLoS one* **10**, e0128509 (2015).
- 447 55. Yu, X. *et al.* Transcriptional responses of *Pseudomonas syringae* to growth in epiphytic versus  
448 apoplactic leaf sites. *Proc. Natl. Acad. Sci. USA* **110**, E425-434 (2013).
- 449 56. Davey, M. E., Caiazza, N. C. & O'Toole, G. A. Rhamnolipid surfactant production affects biofilm  
450 architecture in *Pseudomonas aeruginosa* PAO1. *J. Bacteriol.* **185**, 1027-1036 (2003).
- 451 57. Hirai, H. *et al.* Glycosylation regulates specific induction of rice immune responses by *Acidovorax*  
452 *avenae* flagellin. *J. Biol. Chem.* **286**, 25519-25530 (2011).
- 453 58. Taguchi, F. *et al.* Glycosylation of flagellin from *Pseudomonas syringae* pv. *tabaci* 6605 contributes to  
454 evasion of host tobacco plant surveillance system. *Physiol. Mol. Plant Pathol.* **74**, 11-17 (2009).
- 455 59. Hanuszkiewicz, A. *et al.* Identification of the flagellin glycosylation system in *Burkholderia cenocepacia*  
456 and the contribution of glycosylated flagellin to evasion of human innate immune responses. *J. Biol.*  
457 *Chem.* **289**, 19231-19244 (2014).
- 458 60. Henry, G., Deleu, M., Jourdan, E., Thonart, P. & Ongena, M. The bacterial lipopeptide surfactin targets  
459 the lipid fraction of the plant plasma membrane to trigger immune-related defence responses. *Cell.*  
460 *Microbiol.* **13**, 1824-1837 (2011).
- 461 61. Nasir, M. N. *et al.* Differential interaction of synthetic glycolipids with biomimetic plasma membrane  
462 lipids correlates with the plant biological response. *Langmuir* **33**, 9979-9987 (2017).
- 463 62. Robineau, M. *et al.* Synthetic mono-rhamnolipids display direct antifungal effects and trigger an innate  
464 immune response in tomato against *Botrytis cinerea*. *Molecules* **25**, 3108 (2020).
- 465 63. Abbasi, H., Noghabi, K. A. & Ortiz, A. Interaction of a bacterial monorhamnolipid secreted by  
466 *Pseudomonas aeruginosa* MA01 with phosphatidylcholine model membranes. *Chem. Phys. Lipids* **165**,  
467 745-752 (2012).
- 468 64. Aranda, F. J. *et al.* Thermodynamics of the interaction of a dirhamnolipid biosurfactant secreted by  
469 *Pseudomonas aeruginosa* with phospholipid membranes. *Langmuir* **23**, 2700-2705 (2007).
- 470 65. Ortiz, A., Aranda, F. J. & Teruel, J. A. Interaction of dirhamnolipid biosurfactants with phospholipid  
471 membranes: a molecular level study. *Adv. Exp. Med. Biol.* **672**, 42-53 (2010).
- 472 66. Sanchez, M., Aranda, F. J., Teruel, J. A. & Ortiz, A. Interaction of a bacterial dirhamnolipid with  
473 phosphatidylcholine membranes: a biophysical study. *Chem. Phys. Lipids* **161**, 51-55 (2009).
- 474 67. Monnier, N. *et al.* Exploring the dual interaction of natural rhamnolipids with plant and fungal biomimetic  
475 plasma membranes through biophysical studies. *Int. J. Mol. Sci.* **20**, 1009 (2019).
- 476 68. Lépine, F., Déziel, E., Milot, S. & Villemur, R. Liquid chromatographic/mass spectrometric detection of  
477 the 3-(3-hydroxyalkanoyloxy) alkanonic acid precursors of rhamnolipids in *Pseudomonas aeruginosa*  
478 cultures. *J. Mass Spectrom.* **37**, 41-46 (2002).
- 479 69. Kownatzki, R., Tummler, B. & Doring, G. Rhamnolipid of *Pseudomonas aeruginosa* in sputum of cystic  
480 fibrosis patients. *Lancet* **1**, 1026-1027 (1987).
- 481 70. Read, R. C. *et al.* Effect of *Pseudomonas aeruginosa* rhamnolipids on mucociliary transport and ciliary  
482 beating. *J. Appl. Physiol.* **72**, 2271-2277 (1992).

- 483 71. Somerville, M. *et al.* Release of mucus glycoconjugates by *Pseudomonas aeruginosa* rhamnolipid into  
484 feline trachea *in vivo* and human bronchus *in vitro*. *Am. J. Respir. Cell Mol. Biol.* **6**, 116-122 (1992).
- 485 72. Germer, A. *et al.* Exploiting the natural diversity of RhIA acyltransferases for the synthesis of the  
486 rhamnolipid precursor 3-(3-Hydroxyalkanoyloxy)alkanoic acid. *Appl. Environ. Microbiol.* **86**, e02317-  
487 02319 (2020).
- 488 73. Ranf, S. Immune sensing of lipopolysaccharide in plants and animals: same but different. *PLOS Pathog.*  
489 **12**, e1005596 (2016).
- 490 74. Compant, S., Nowak, J., Coenye, T., Clément, C. & Ait Barka, E. Diversity and occurrence of  
491 *Burkholderia* spp. in the natural environment. *FEMS Microbiol. Rev.* **32**, 607-626 (2008).
- 492 75. Kay, E., Bertolla, F., Vogel, T. M. & Simonet, P. Opportunistic colonization of *Ralstonia solanacearum*-  
493 infected plants by *Acinetobacter* sp. and its natural competence development. *Microb. Ecol.* **43**, 291-  
494 297 (2002).
- 495 76. Silby, M. W., Winstanley, C., Godfrey, S. A., Levy, S. B. & Jackson, R. W. *Pseudomonas* genomes:  
496 diverse and adaptable. *FEMS Microbiol. Rev.* **35**, 652-680 (2011).
- 497 77. Toth, I. K., Pritchard, L. & Birch, P. R. J. Comparative genomics reveals what makes an enterobacterial  
498 plant pathogen. *Annu. Rev. Phytopathol.* **44**, 305-336 (2006).
- 499 78. Yu, X. *et al.* Transcriptional analysis of the global regulatory networks active in *Pseudomonas syringae*  
500 during leaf colonization. *mBio* **5**, e01683-01614 (2014).
- 501 79. Zhu, K. & Rock, C. O. RhIA converts beta-hydroxyacyl-acyl carrier protein intermediates in fatty acid  
502 synthesis to the beta-hydroxydecanoyl-beta-hydroxydecanoate component of rhamnolipids in  
503 *Pseudomonas aeruginosa*. *J. Bacteriol.* **190**, 3147-3154 (2008).
- 504 80. Buscaill, P. *et al.* Glycosidase and glycan polymorphism control hydrolytic release of immunogenic  
505 flagellin peptides. *Science* **364**, eaav0748 (2019).
- 506 81. Taguchi, F. *et al.* Effects of glycosylation on swimming ability and flagellar polymorphic transformation  
507 in *Pseudomonas syringae* pv. *tabaci* 6605. *J. Bacteriol.* **190**, 764-768 (2008).
- 508 82. Smith, J. M. & Heese, A. Rapid bioassay to measure early reactive oxygen species production in  
509 *Arabidopsis* leave tissue in response to living *Pseudomonas syringae*. *Plant Methods* **10**, 6 (2014).
- 510 83. Magnin-Robert, M. *et al.* Modifications of sphingolipid content affect tolerance to hemibiotrophic and  
511 necrotrophic pathogens by modulating plant defense responses in *Arabidopsis*. *Plant Physiol.* **169**,  
512 2255-2274 (2015).
- 513 84. De Vleeschouwer, M. *et al.* Rapid total synthesis of cyclic lipodepsipeptides as a premise to investigate  
514 their self-assembly and biological activity. *Chem. Eur. J.* **20**, 7766-7775 (2014).

515  
516  
517

## Acknowledgments

518 We are thankful to Laetitia Parent and Sylvain Milot for technical support and Ralph Hüchelhoven for  
519 critical discussion. This work was supported by grants from EliDeRham and Rhamnoprot (Région Grand Est).  
520 The project Rhamnoprot is co-funded by the European Union FEDER program. Work on rhamnolipids in the  
521 Déziel Lab is funded by the Natural Sciences and Engineering Research Council of Canada (NSERC) through  
522 Discovery grants RGPIN-2015-03931 and RGPIN-2020-06771. Work in the Ranf lab is supported by the  
523 German Research Foundation (SFB924/TP-B10 and Emmy Noether programme RA2541/1).

524  
525

## Author contributions

526 J.C. and S.D. designed the research; R.S., J.C., A.K., T.G., M.T., S.V., S.D.C. performed the  
527 experiments; A.N. and E.D. purified and characterized HAAs and *B. glumae* RLs; M.C. and C.G. chemically  
528 synthesized HAAs; N.B., J.H., A.H. and J.H.R., purified *P. aeruginosa* RLs; C.D. and C.S. quantified mc-3-OH-  
529 FAs in all samples; R.S., J.C., S.C., F.M.G., F.B., S.R., E.D. and S.D. analyzed the data; R.S., J.C. and S.D.

530 wrote the manuscript. M.O., J.H.R., A.H., T.H., C.Z., F.B., C.C., S.R and E.D contributed ideas, and critically  
531 revised the manuscript. All authors discussed the results and approved the manuscript.

532

### 533 **Additional Information**

534

#### 535 **Data availability**

536 The authors declare that all data supporting the findings of this study can be found within the manuscript  
537 and its Supplementary Files. Additional data supporting the findings of this study are available from the  
538 corresponding authors upon request.

539

#### 540 **Competing financial interests**

541 Technical University of Munich has filed a patent application to inventors A.K., C.D., T.H., and S.R. The  
542 authors declare no financial conflicts of interest in relation to this work.

543 All other author(s) declare no competing financial and/or non-financial interests.

544

545

546

547

548

549

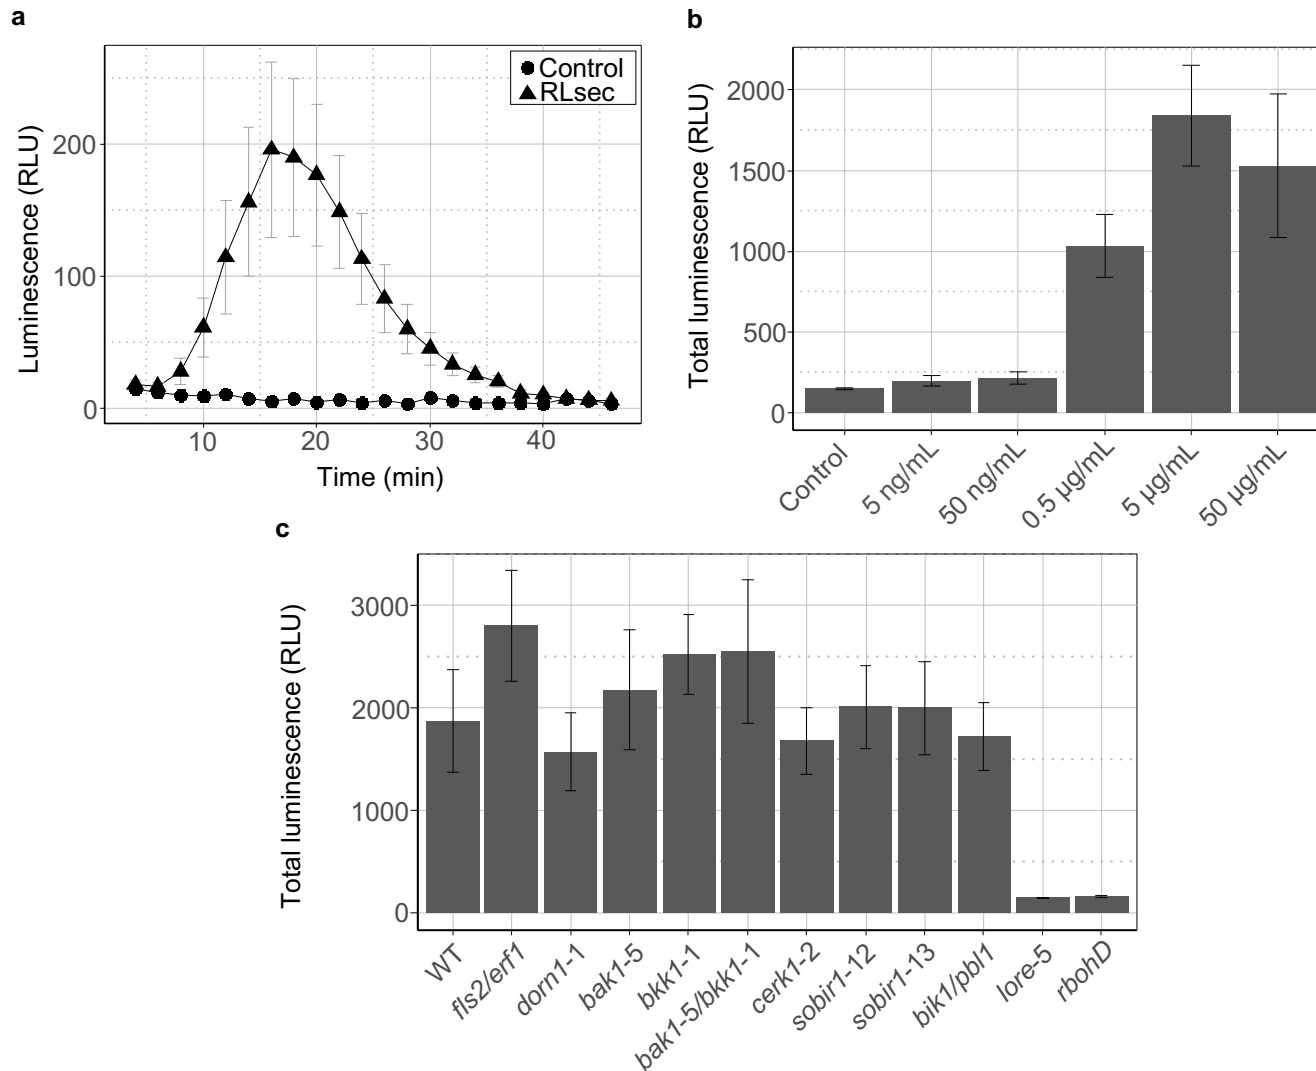

**Figure 1: RLsec activates LORE-dependent early immune-related responses in *Arabidopsis*.** (a) Extracellular ROS production after treatment of WT leaf petioles with 50 µg/mL RLsec or EtOH as control. (b) Dose effect of RLsec on ROS production. ROS production measured after treatment of WT leaf petioles with the indicated concentrations of RLsec or EtOH as control. (c) ROS production measured after treatment of WT, *fls2/err1*, *dorn1-1*, *bak1-5*, *bkk1-1*, *bak1-5/bkk1-1*, *cerk1-2*, *sobir1-12*, *sobir1-13*, *bik1/pbl1*, *lore-5*, or *rbohD* leaf petioles with 50 µg/mL RLsec. (a,b,c) Data are mean ± SEM (n = 6). Experiments have been realized three times with similar results.

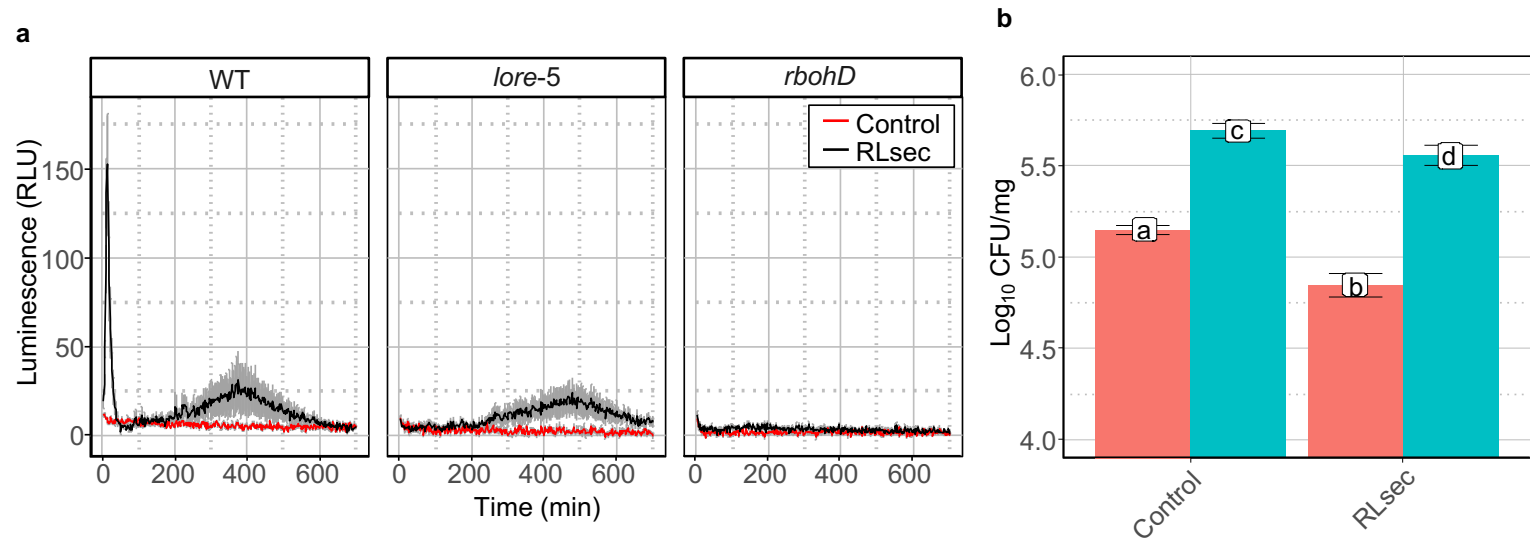

**Figure 2: RLsec activates LORE-independent responses in *Arabidopsis*.** (a) Extracellular ROS production after treatment of WT, *lore-5*, and *rbohD* leaf petioles with 50 µg/mL RLsec or EtOH (Control). ROS production was monitored over 720 minutes. Data are mean ± SEM (n = 6). Experiments have been realized three times with similar results. (b) WT (red) and *lore-5* (blue) *Arabidopsis* leaves were treated with 50 µg/mL RLsec or EtOH (control) 48 h before infection. *Pst* titers were measured at 3 d.p.i. Data are mean ± SD (n = 6, 5, 6, 6 (left to right)). Experiments have been realized twice with similar results. Letters represent results of pairwise Wilcoxon-Mann-Whitney statistic test with  $P > 0.05$  (same letters) or  $P \leq 0.05$  (different letters).



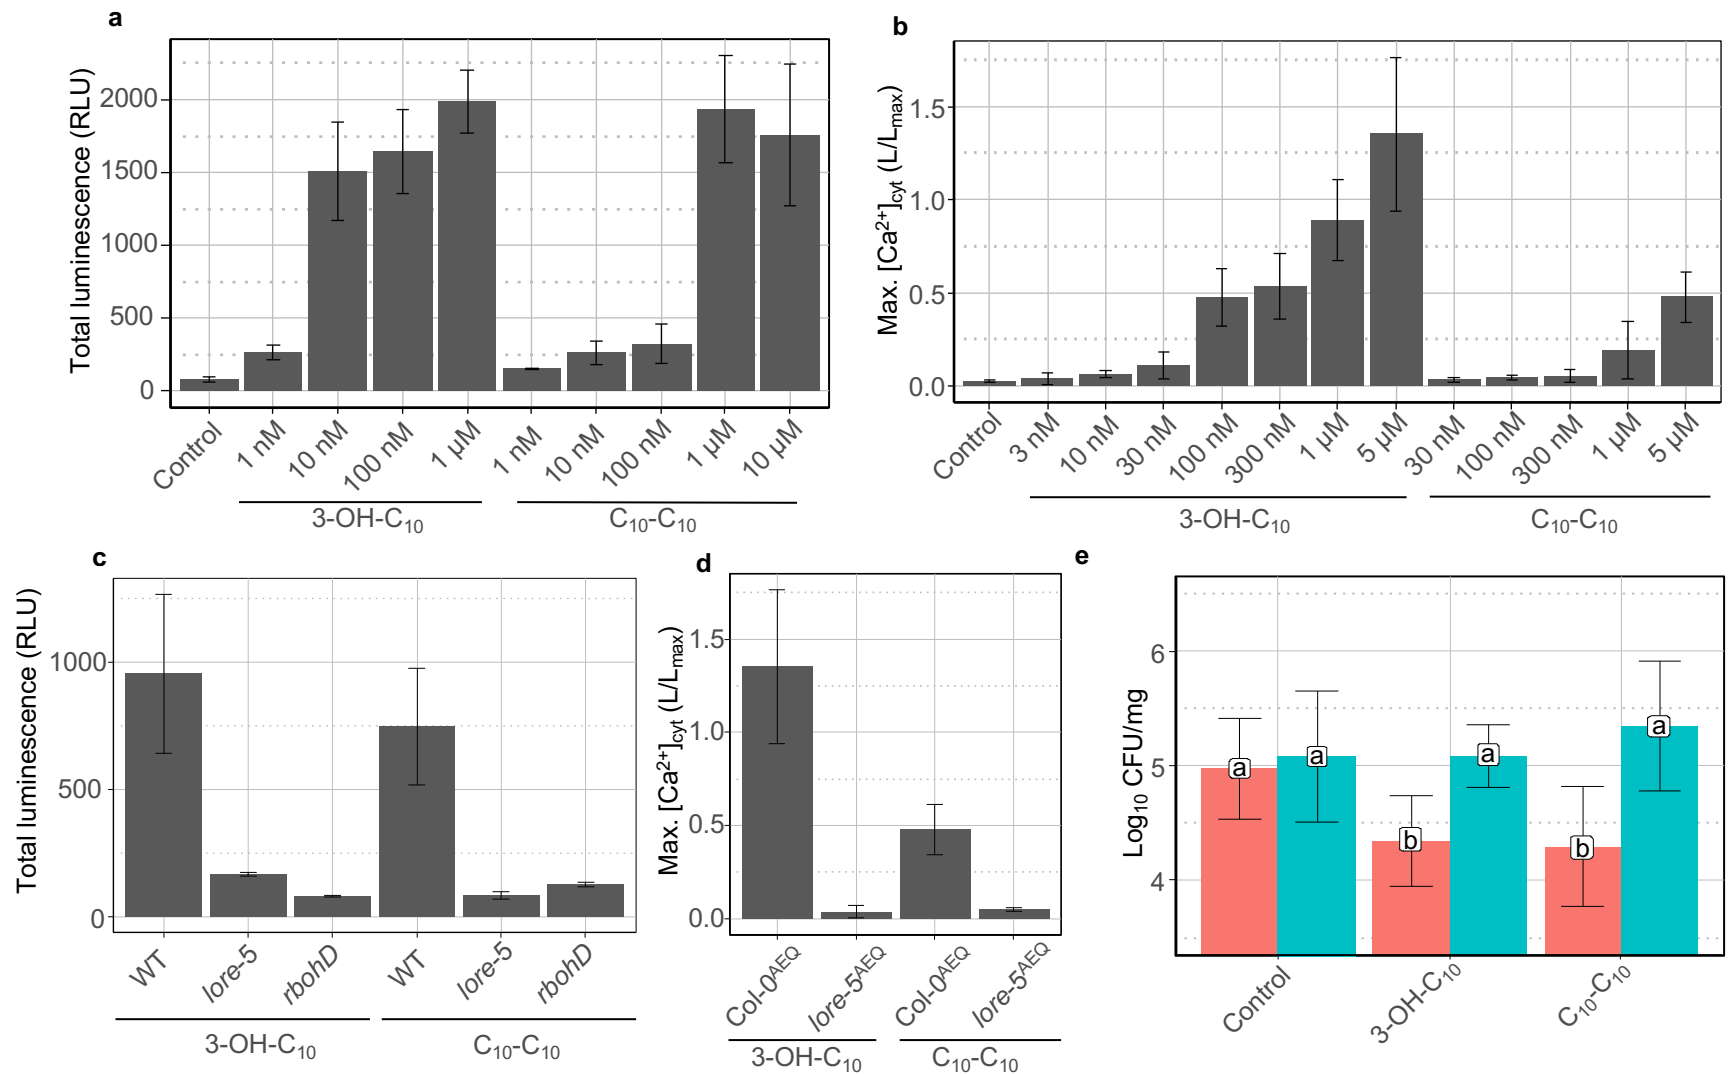

**Figure 3: Purified HAAs from *P. aeruginosa* trigger a LORE-dependent immune response in *Arabidopsis*.** (a) Dose effect of 3-OH-C<sub>10</sub> and C<sub>10</sub>-C<sub>10</sub> purified from *P. aeruginosa* on ROS production by WT leaf petioles. EtOH was used as negative control. Data are mean ± SEM (n = 6). Experiments have been realized twice with similar results. (b) Maximum (Max.) increases in [Ca<sup>2+</sup>]<sub>cyt</sub> in *Arabidopsis* Col-0<sup>AEQ</sup> seedlings treated with different concentrations of 3-OH-C<sub>10</sub>, C<sub>10</sub>-C<sub>10</sub> purified from *P. aeruginosa* or MeOH as control. Data are mean ± SD (n = 3). Experiments have been realized twice with similar results. (c) ROS production measured after treatment of WT, *lore-5*, or *rbohD* leaf petioles with 10 μM 3-OH-C<sub>10</sub>, 10 μM purified C<sub>10</sub>-C<sub>10</sub> or EtOH as control. Data are mean ± SEM (n = 6). Experiments have been realized three times with similar results. (d) Maximum (Max.) increases in [Ca<sup>2+</sup>]<sub>cyt</sub> in *Arabidopsis* Col-0<sup>AEQ</sup> and *lore-5*<sup>AEQ</sup> seedlings treated with 5 μM 3-OH-C<sub>10</sub> or purified C<sub>10</sub>-C<sub>10</sub>. Data are mean ± SD (n = 3). Experiments have been realized twice with similar results. For b and d, the same Col-0<sup>AEQ</sup> 5μM data are presented (same experiments). (e) WT (red) and *lore-5* (blue) *Arabidopsis* leaves were treated with 10 μM 3-OH-C<sub>10</sub>, 10 μM purified C<sub>10</sub>-C<sub>10</sub> or EtOH (control) 48 h before infection. *Pst* titers were measured at 3 d.p.i. Data are mean ± SD (n = 27, 31, 38, 13, 30, 37 (left to right)). Experiments have been realized twice with similar results. Letters represent data of pairwise Wilcoxon-Mann-Whitney statistic test with *P* > 0.05 (same letters) or *P* ≤ 0.05 (different letters).

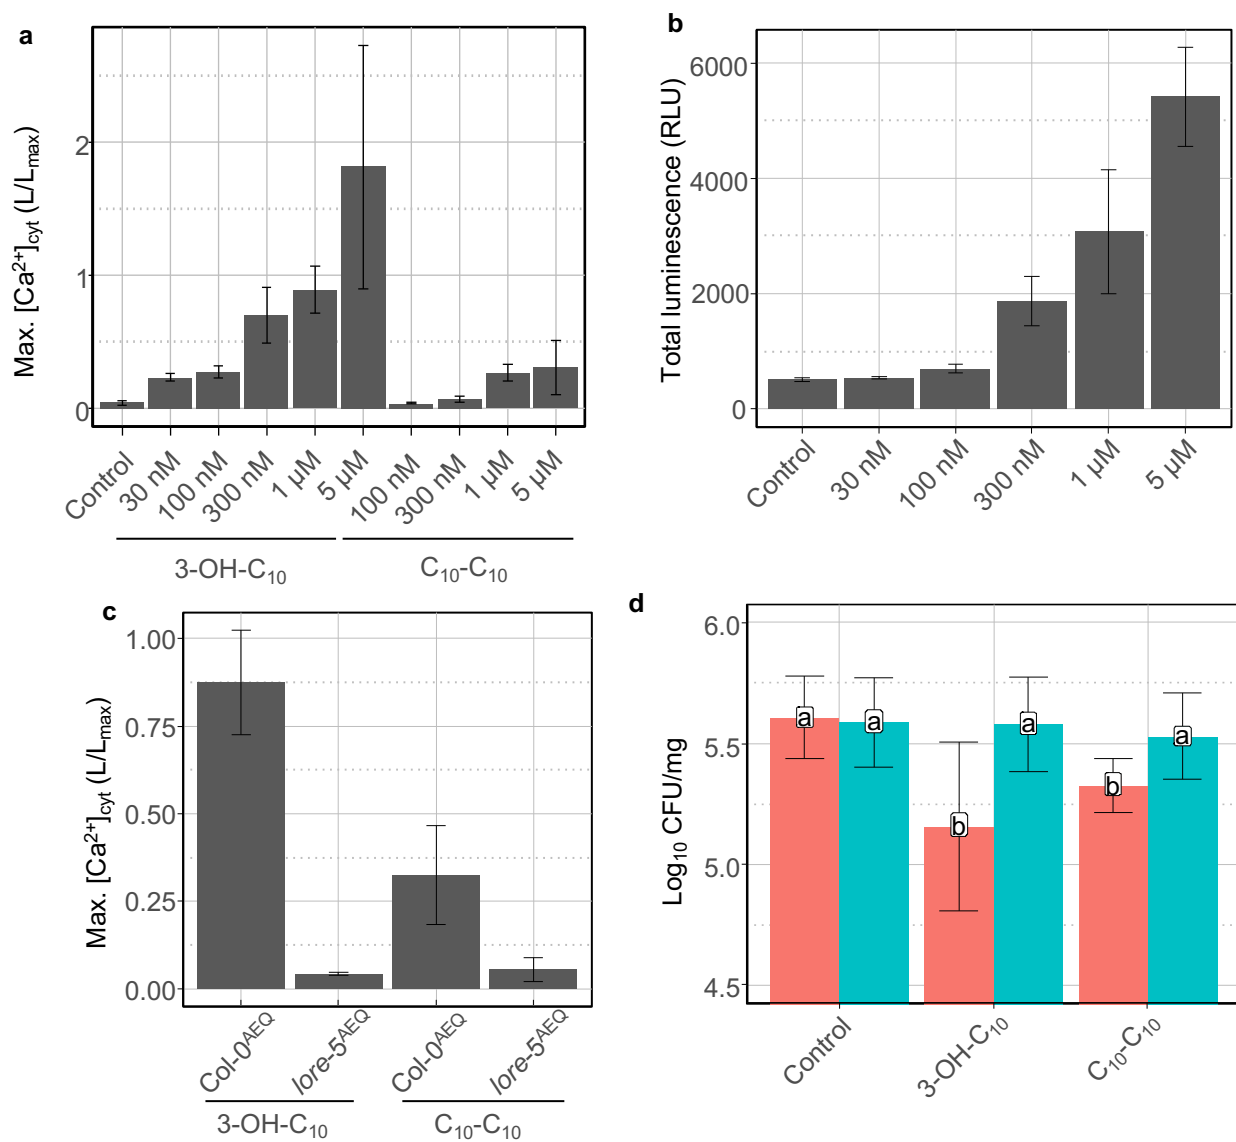

**Figure 4: Synthetic HAAs trigger a LORE-dependent immune response in *Arabidopsis*.** (a) Maximum (Max.) increases in  $[Ca^{2+}]_{cyt}$  in *Arabidopsis* Col-0<sup>AEQ</sup> seedlings treated with different concentrations of 3-OH-C<sub>10</sub>, synthetic C<sub>10</sub>-C<sub>10</sub> or MeOH. Data are mean  $\pm$  SD (n = 3). Experiments have been realized twice with similar results. (b) Dose effect of synthetic C<sub>10</sub>-C<sub>10</sub> on ROS production by WT leaf petioles. EtOH was used as negative control. Data are mean  $\pm$  SEM (n = 6). Experiments have been realized twice with similar results. (c) Maximum (Max.) increases in  $[Ca^{2+}]_{cyt}$  in *Arabidopsis* Col-0<sup>AEQ</sup> and *lore-5*<sup>AEQ</sup> seedlings treated with 5  $\mu$ M 3-OH-C<sub>10</sub>, synthetic C<sub>10</sub>-C<sub>10</sub> or MeOH. Data are mean  $\pm$  SD (n = 3). Experiments have been realized twice with similar results. (d) WT (red) and *lore-5* (blue) *Arabidopsis* leaves were treated with 10  $\mu$ M 3-OH-C<sub>10</sub>, 10  $\mu$ M synthetic C<sub>10</sub>-C<sub>10</sub>, or MeOH (control) 48 h before infection. *Pst* titers were measured at 3 d.p.i. Data are mean  $\pm$  SD (n = 17, 21, 21, 30, 14, 30 (left to right)). Experiments have been realized twice with similar results. Letters represent data of pairwise Wilcoxon-Mann-Whitney statistic test with  $P > 0.05$  (same letters) or  $P \leq 0.05$  (different letters).

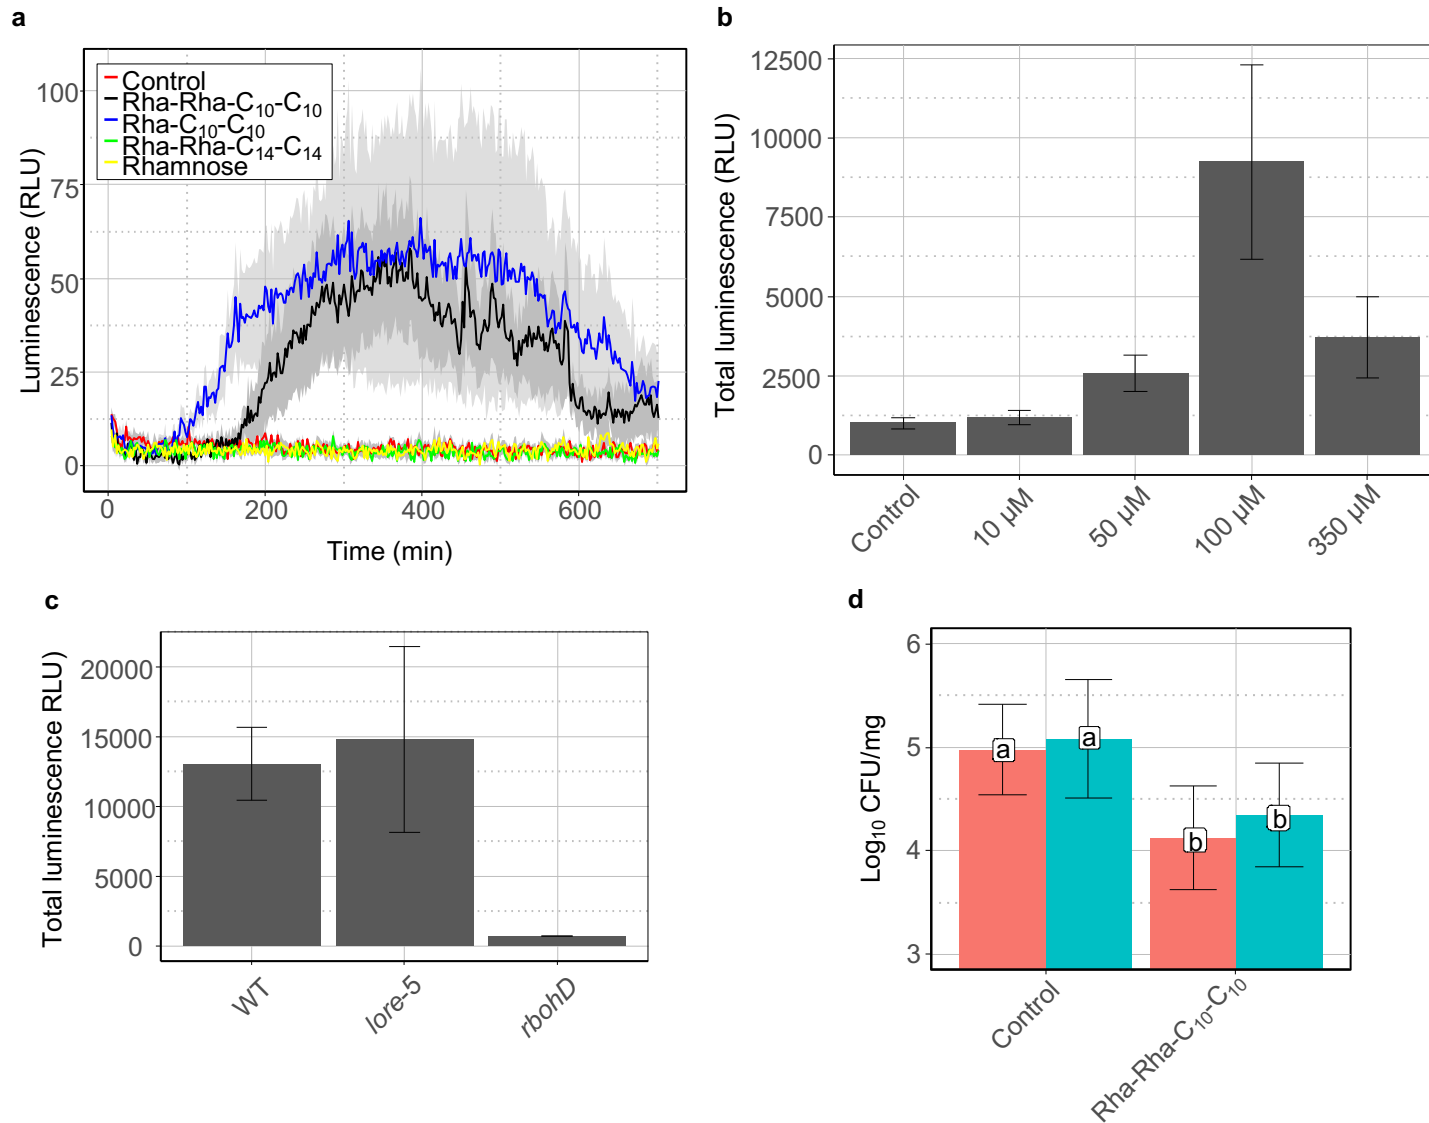

**Figure 5: Purified RLs trigger a LORE-independent *Arabidopsis* immune response.** (a) Extracellular ROS production after treatment of WT leaf petioles with 100 μM RLs, 100 μM L-rhamnose, or EtOH (control). Data are mean ± SEM (n = 6). (b) Dose effect of Rha-Rha-C<sub>10</sub>-C<sub>10</sub> on ROS production. ROS production measured after treatment of WT leaf petioles with the indicated concentrations of Rha-Rha-C<sub>10</sub>-C<sub>10</sub> or EtOH (control). Data are mean ± SEM (n = 6). (c) ROS production measured after treatment of WT, *lore-5*, or *rbohD* leaf petioles with 100 μM Rha-Rha-C<sub>10</sub>-C<sub>10</sub>. Data are mean ± SEM (n = 6). (d) WT (red) and *lore-5* (blue) *Arabidopsis* leaves were treated with 10 μM Rha-Rha-C<sub>10</sub>-C<sub>10</sub> or EtOH (control) 48 h before infection. *Pst* titers were measured at 3 d.p.i. Data are mean ± SD (n = 27, 31, 30, 26 (left to right)). Letters represent data of pairwise Wilcoxon-Mann-Whitney statistic test with  $P > 0.05$  (same letters) or  $P \leq 0.05$  (different letters). (a,b,c,d) Experiments have been realized three times with similar results.

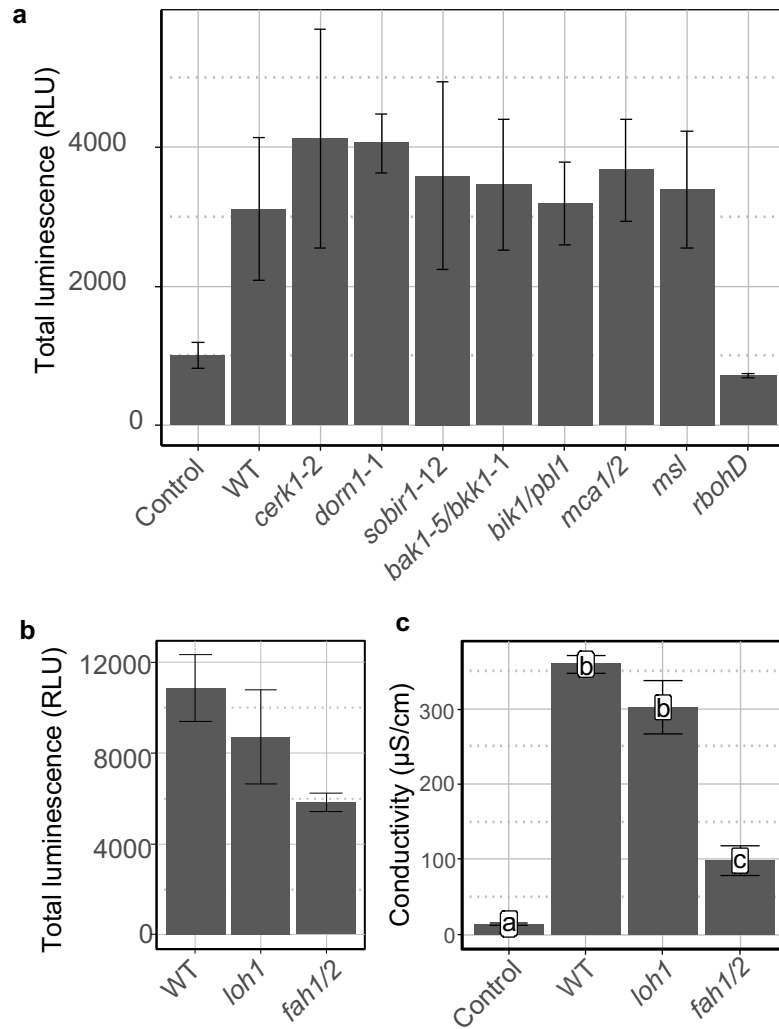

**Figure 6: RL perception is impacted by plasma membrane sphingolipid composition.** Extracellular ROS production after treatment of (a) WT, *cerk1-2*, *dorm1-1*, *sobir1-12*, *bak1-5/bkk1-1*, *bik1/pbl1*, *mca1/2*, *msl4/5/6/9/10* (*msl*), or *rbohD*, and (b) WT, *loh1*, or *fah1/2* *Arabidopsis* leaf petioles with 100 µM Rha-Rha-C<sub>10</sub>-C<sub>10</sub> or EtOH (control). Data are mean ± SEM (n = 6). Experiments have been realized three times with similar results. (c) Electrolyte leakage induced by 100 µM Rha-Rha-C<sub>10</sub>-C<sub>10</sub> or EtOH (Control) on WT, *loh1*, or *fah1/2* *Arabidopsis* leaf discs 24h post treatment. Data are mean ± SEM (n = 6). Letters represent data of pairwise Wilcoxon-Mann-Whitney statistic test with  $P > 0.05$  (same letters) or  $P \leq 0.05$  (different letters). Experiments have been realized twice with similar results.

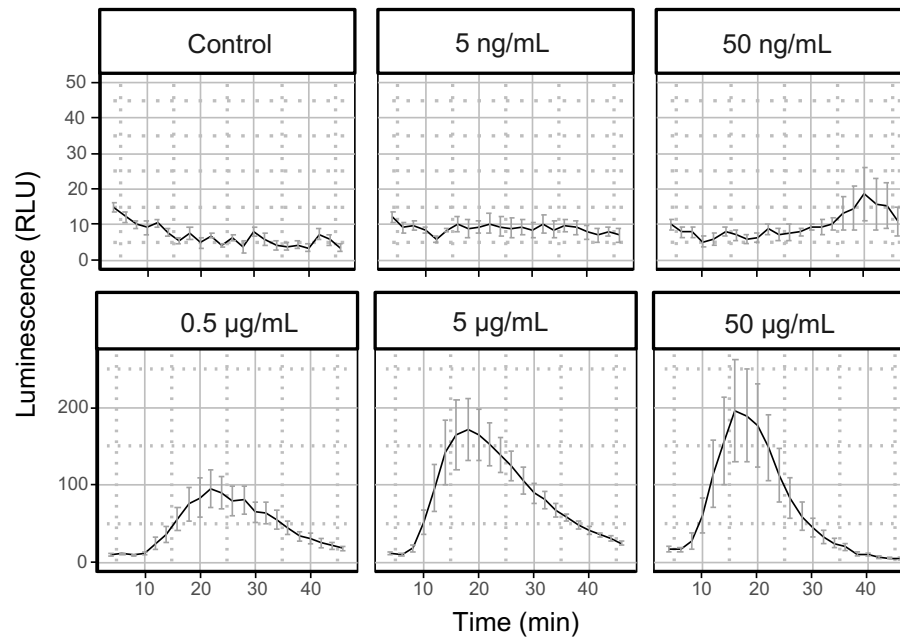

**Supplementary figure 1: RLsec dose effect on ROS.** ROS production measured after treatment of WT leaf petioles with RLsec at the indicated concentrations or EtOH (control). Data are mean  $\pm$  SEM (n = 6). Experiments have been realized three times with similar results. The data presented here as kinetic are from the same experiments illustrated in figure 1b.

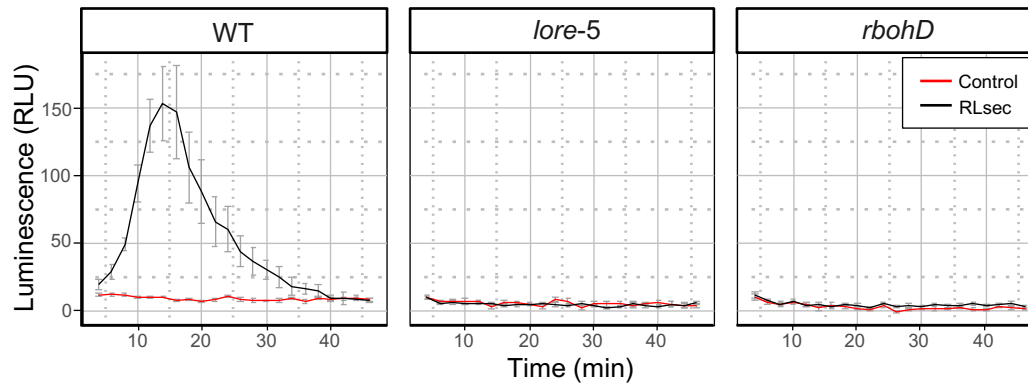

**Supplementary figure 2: RLsec induce early ROS production through LORE and RBOHD in *Arabidopsis*.** Extracellular ROS production after treatment of WT, *lore-5*, or *rbohD* leaf petioles with 50  $\mu\text{g}/\text{mL}$  RLsec or EtOH (control). Data are mean  $\pm$  SEM ( $n = 6$ ). Experiments have been realized three times with similar results. The data presented here as kinetic are from the same experiments illustrated in figure 1c.

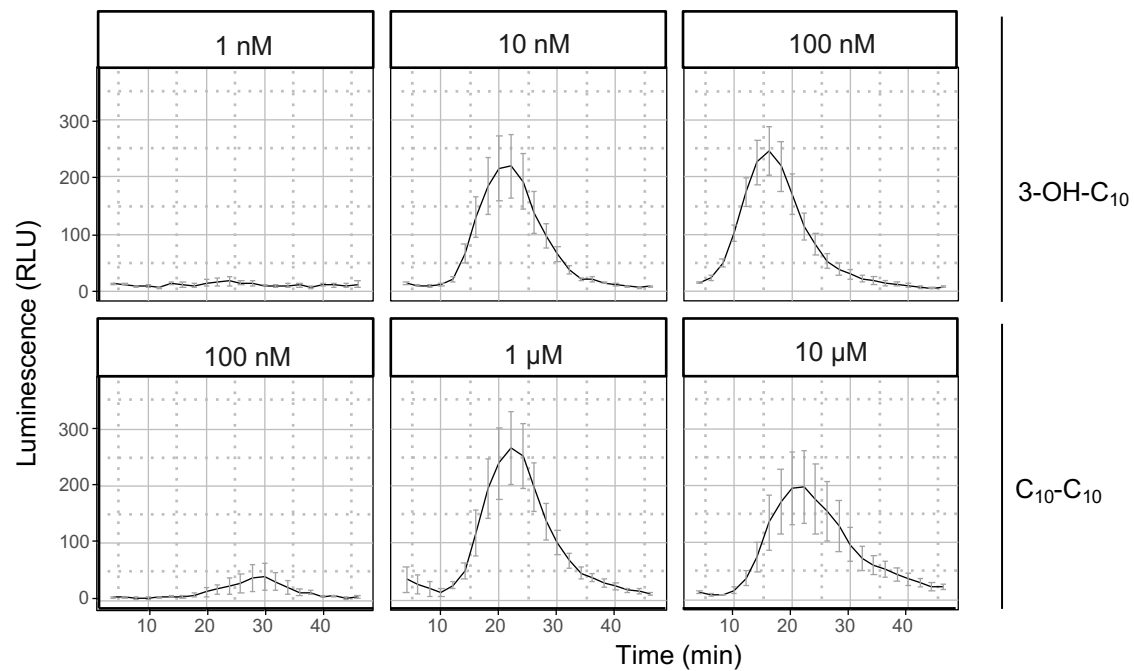

**Supplementary figure 3: Dose effect of 3-OH-C<sub>10</sub> and C<sub>10</sub>-C<sub>10</sub> purified from *P. aeruginosa* on ROS production.** ROS production measured after treatment of WT leaf petioles with the indicated concentrations of 3-OH-C<sub>10</sub> and purified C<sub>10</sub>-C<sub>10</sub>. Data are mean ± SEM (n = 6). Experiments have been realized twice with similar results. The data presented here as kinetic are from the same experiments illustrated in figure 3a.

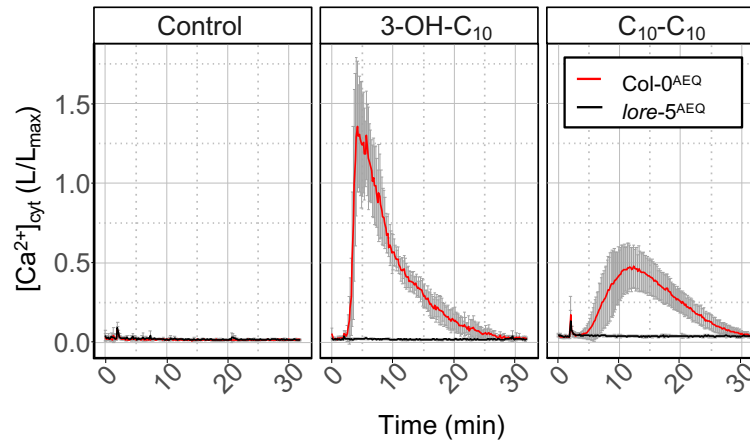

**Supplementary figure 4: Time course Ca<sup>2+</sup> signaling.** [Ca<sup>2+</sup>]<sub>cyt</sub> over time in *Col-0*<sup>AEQ</sup> and *lore-5*<sup>AEQ</sup> seedlings after treatment with 5 μM purified C<sub>10</sub>-C<sub>10</sub>, 5 μM 3-OH-C<sub>10</sub> or MeOH (control). Data are mean ± SD (n = 3). Experiments have been realized twice with similar results. The data presented here as kinetic are from the same experiments illustrated in figure 3b.



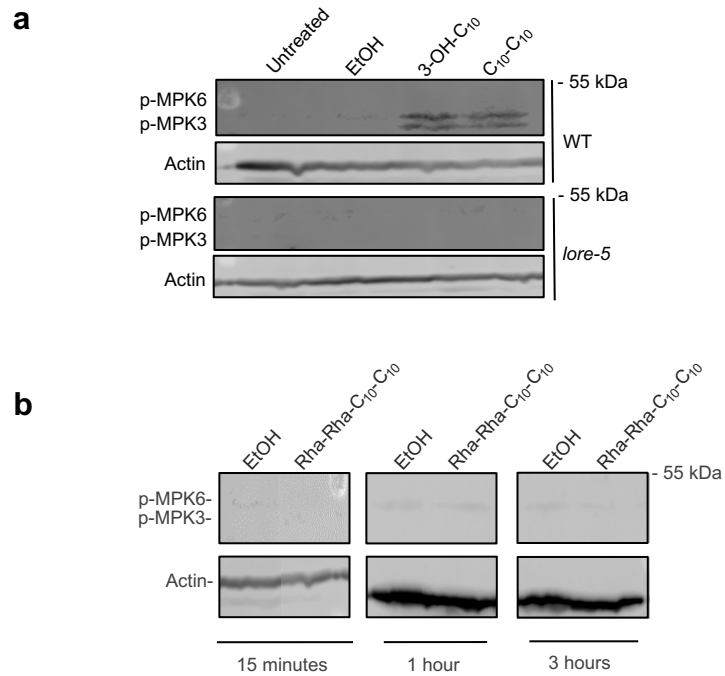

**Supplementary figure 5: MAPK assay.** Activation of MPK3 and MPK6 in **(a)** WT and *lore-5* leaf disk 15 minutes after treatment with 10  $\mu$ M 3-OH-C<sub>10</sub>, 10  $\mu$ M purified C<sub>10</sub>-C<sub>10</sub> or EtOH; **(b)** WT leaf disk 15 minutes, 1 hour, and 3 hours after treatment with 100  $\mu$ M Rha-Rha-C<sub>10</sub>-C<sub>10</sub> or EtOH. Actin was used as loading control. Experiments have been realized twice with similar results.

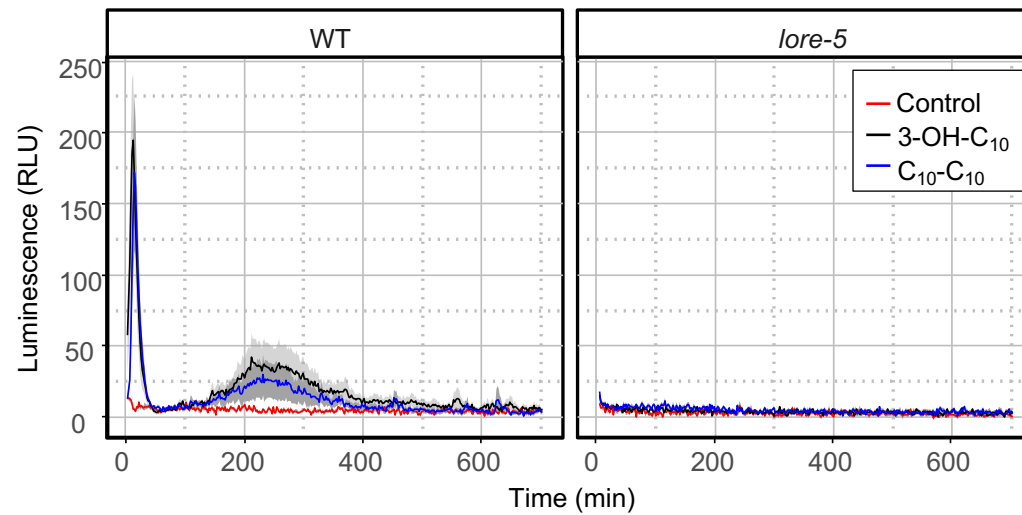

**Supplementary figure 6:** ROS production measured after treatment of WT or *lore-5* leaf petioles with 10  $\mu\text{M}$  3-OH-C<sub>10</sub>, 10  $\mu\text{M}$  purified C<sub>10</sub>-C<sub>10</sub> or EtOH (control). Data are mean  $\pm$  SEM (n = 6). Experiments have been realized twice with similar results.

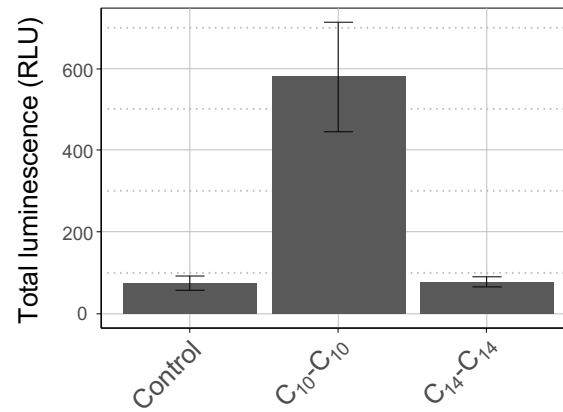

**Supplementary figure 7: Chain length of HAAs impact *Arabidopsis* ROS immune response.** ROS production measured after treatment of WT leaf petioles with 10  $\mu$ M of purified C<sub>10</sub>-C<sub>10</sub> from *Pseudomonas aeruginosa*, C<sub>14</sub>-C<sub>14</sub> purified from *Burkholderia glumae* or with EtOH (control). Data are mean  $\pm$  SEM (n = 6). Experiments have been realized three times with similar results.

| Molecule                                                            | % (dry weight) |
|---------------------------------------------------------------------|----------------|
| <b>3-OH-C<sub>8</sub>, 3-OH-C<sub>10</sub>, 3-OH-C<sub>12</sub></b> | <b>0.37</b>    |
| <b>HAAs</b>                                                         | <b>3.75</b>    |
| C <sub>8</sub> -C <sub>8</sub>                                      | 0.23           |
| C <sub>8</sub> -C <sub>10</sub>                                     | 0.85           |
| C <sub>10</sub> -C <sub>10</sub>                                    | 2.13           |
| C <sub>10</sub> -C <sub>12</sub>                                    | 0.26           |
| C <sub>12</sub> -C <sub>12</sub>                                    | 0              |
| C <sub>8</sub> -C <sub>12:1</sub>                                   | 0.09           |
| C <sub>10</sub> -C <sub>12:1</sub>                                  | 0.12           |
| C <sub>12</sub> -C <sub>12:1</sub>                                  | 0.07           |
| <b>monorhamnolipids</b>                                             | <b>50.94</b>   |
| Rha-C <sub>8</sub> -C <sub>8</sub>                                  | 0              |
| Rha-C <sub>8</sub> -C <sub>10</sub>                                 | 5.28           |
| Rha-C <sub>10</sub> -C <sub>10</sub>                                | 37.61          |
| Rha-C <sub>10</sub> -C <sub>12</sub>                                | 3.53           |
| Rha-C <sub>12</sub> -C <sub>12</sub>                                | 0.06           |
| Rha-C <sub>8</sub> -C <sub>12:1</sub>                               | 0.72           |
| Rha-C <sub>10</sub> -C <sub>12:1</sub>                              | 3.55           |
| Rha-C <sub>12</sub> -C <sub>12:1</sub>                              | 0.19           |
| <b>dirhamnolipids</b>                                               | <b>44.94</b>   |
| Rha-Rha-C <sub>8</sub> -C <sub>8</sub>                              | 0.36           |
| Rha-Rha-C <sub>8</sub> -C <sub>10</sub>                             | 4.33           |
| Rha-Rha-C <sub>10</sub> -C <sub>10</sub>                            | 33.14          |
| Rha-Rha-C <sub>10</sub> -C <sub>12</sub>                            | 4.22           |
| Rha-Rha-C <sub>12</sub> -C <sub>12</sub>                            | 0.10           |
| Rha-Rha-C <sub>8</sub> -C <sub>12:1</sub>                           | 0.64           |
| Rha-Rha-C <sub>10</sub> -C <sub>12:1</sub>                          | 1.88           |
| Rha-Rha-C <sub>12</sub> -C <sub>12:1</sub>                          | 0.27           |

**Supplementary table 1 : RLsec composition.** Distribution of congeners (percent) present in the lipidic secretome produced by *P. aeruginosa* (Jeneil, JBR-599, lot. #050629).

| Molecules                                            | Origin                                              | Reference  | Sample concentration (for quantification) | Free 3-OH-C <sub>10</sub> concentration | Sample concentrations (for biological assays) | Concentration of 3-OH-C <sub>10</sub> at the compound concentration used for the experiments | MTI in <i>Arabidopsis</i> | LORE-dependent |
|------------------------------------------------------|-----------------------------------------------------|------------|-------------------------------------------|-----------------------------------------|-----------------------------------------------|----------------------------------------------------------------------------------------------|---------------------------|----------------|
| <b>Mono-RL (Rha-C<sub>10</sub>-C<sub>10</sub>)</b>   | <i>Pseudomonas aeruginosa</i> PA14                  | 36         | 5 mM                                      | 0.28 μM                                 | 100 μM                                        | 5 nM                                                                                         | Yes                       | No             |
| <b>Di-RL (Rha-Rha-C<sub>10</sub>-C<sub>10</sub>)</b> | <i>Pseudomonas aeruginosa</i> PA14                  | 36         | 5 mM                                      | 0.05 μM                                 | 10 μM to 350 μM                               | 100 pM to 3 nM                                                                               | Yes                       | No             |
| <b>Di-RL (Rha-Rha-C<sub>14</sub>-C<sub>14</sub>)</b> | <i>Burkholderia glumae</i>                          | 53         | nd                                        | nd                                      | 100 μM                                        | nd                                                                                           | No                        | No             |
| <b>C<sub>14</sub>-C<sub>14</sub></b>                 | <i>Burkholderia glumae</i>                          | this study | 1 mM                                      | <LOQ                                    | 10 μM                                         | <LOQ                                                                                         | No                        | No             |
| <b>C<sub>10</sub>-C<sub>10</sub></b>                 | <i>Pseudomonas aeruginosa</i> PA14                  | this study | 0.1 mM                                    | 0.09 μM                                 | 1 nM to 10 μM                                 | 0.9 pM to 9 nM                                                                               | Yes                       | Yes            |
| <b>Synthetic C<sub>10</sub>-C<sub>10</sub></b>       | Chemical synthesis (see Supplementary data 1 and 2) | this study | 0.1 mM                                    | <LOQ                                    | 30 nM to 10 μM                                | <LOQ                                                                                         | Yes                       | Yes            |

**Supplementary table 2: Quantification of free 3-OH-C<sub>10</sub> in HAA and RL samples.**
